# Supplementary material for: RUNX2 isoform II protects cancer cells from ferroptosis and apoptosis by promoting PRDX2 expression in oral squamous cell carcinoma
Source: eLife journal article supplement (doi:10.7554/elife.99122), 2024-09-06
Supplement: fig1-data1 [file elife-99122-fig1-data1-v1.zip]

**fig1-data1**. Original data corresponding to Figure 1B.

**fig1-data2**. Original data corresponding to Figure 1C.

**fig1-data3**. Original data corresponding to Figure 1D.

**fig1-data4**. Original data corresponding to Figure 1E.

**fig1-data5**. PDF file containing original RT-PCR images for Figure 1G, indicating the relevant bands and different OSCC patients.

**fig1-data6**. Original files for RT-PCR analysis displayed in Figure 1G.

**fig1-data7**. Original data corresponding to Figure 1H.

**fig1-data8**. Original data corresponding to Figure 1I.
