# Supplementary material for: RUNX2 isoform II protects cancer cells from ferroptosis and apoptosis by promoting PRDX2 expression in oral squamous cell carcinoma
Source: eLife journal article supplement (doi:10.7554/elife.99122), 2024-09-06
Supplement: fig1-data1 [file fig1-data1.xlsx]

## Sheet: Sheet1
Normal	Tumor
225.575	646.433
1264.17	357.634
379.512	404.127
290.618	253.609
436.253	181.454
325.027	217.247
253.962	341.768
684.68	400.922
237.288	109.895
2066.57	679.743
75.7391	233.415
102.293	352.679
112.561	591.89
84.3184	187.091
89.3032	59.714
102.316	249.315
407.627	303.432
297.062	166.355
521.508	883.262
380.415	180.106
1025.79	380.545
112.825	153.115
138.988	207.14
109.296	61.92
143.132	231.496
112.561	200.905
49.8798	79.5859
1197.43	307.871
699.718	1005.5
214.936	220.292
89.6638	29.3255
737.037	390.922
	519.506
	380.423
	338.55
	360.47
	512.738
	332.636
	758.523
	416.995
	292.202
	853.617
	205.014
	83.9386
	259.041
	237.013
	459.444
	175.473
	327.533
	459.854
	435.862
	328.819
	356.841
	126.225
	1568.95
	263.036
	94.4484
	950.572
	113.086
	171.998
	129.241
	325.529
	391.01
	49.3151
	364.311
	340.058
	264.928
	1102.31
	260.746
	765.58
	238.952
	224.159
	522.769
	314.671
	174.359
	592.892
	684.104
	191.699
	354.817
	485.938
	137.137
	411.924
	276.991
	645.359
	221.33
	368.602
	178.145
	362.264
	754.03
	177.457
	376.317
	217.64
	255.153
	948.986
	427.787
	284.316
	376.16
	651.031
	978.364
	355.777
	325.16
	532.038
	671.423
	444.946
	327.798
	732.123
	368.139
	146.169
	199.415
	205.343
	149.554
	277.7
	507.81
	214.854
	679.77
	227.972
	481.569
	158.785
	182.946
	135.166
	108.226
	323.214
	912.033
	80.4097
	797.811
	366.278
	406.992
	184.023
	356.979
	461.033
	836.289
	233.377
	494.663
	645.116
	335.473
	269.947
	321.78
	385.154
	179.617
	292.838
	507.817
	81.3051
	278.687
	537.92
	536.641
	237.67
	505.291
	226.231
	313.475
	195.417
	305.537
	524.725
	537.808
	576.398
	115.868
	140.845
	1357.36
	859.691
	295.335
	15.1527
	550.345
	119.493
	274.008
	456.024
	307.55
	308.183
	475.187
	386.48
	640.122
	317.063
	138.651
	272.243
	320.928
	344.123
	408.619
	265.78
	705.927
	509.243
	591.394
	568.506
	249.062
	214.121
	49.1909
	1357.07
	321.45
	714.727
	363.426
	266.854
	83.5655
	448.885
	55.6988
	457.267
	382.495
	267.567
	169.772
	96
	300.05
	518.047
	214.134
	121.653
	283.785
	505.372
	1081.02
	141.398
	399.354
	92.8285
	485.705
	290.87
	669.451
	120.276
	98.7281
	416.338
	352.667
	297.119
	224.22
	252.829
	191.561
	335.439
	42.6675
	208.293
	156.917
	649.693
	178.58
	230.859
	160.395
	708.426
	874.63
	189.607
	247.695
	381.391
	74.5808
	256.509
	320.452
	78.3474
	125.624
	256.911
	882.279
	348.952
	828.979
	1883.07
	380.919
	522.741
	346.297
	206.161
	359.891
	274.789
	422.229
	360.626
	188.215
	251.254
	617.565
	872.242
	267.798
	363.781
	164.483
	768.903
	445.933
	2427.54
	171.439
	174.663
	691.97
	173.831
	225.939
	159.435
	428.977
	407.325
	134.444
	55.9036
	541.344
	675.095
	359.315
	37.296
	428.865
	434.352
	422.105
	159.442
	135.357
	461.492
	100.451
	558.265
	581.757
	267.331
	506.501
	403.148
	122.294
	81.8054
	151.383
	133.436
	654.827
	215.595
	3251.24
	553.6
	265.681
	83.9866
	418.397
	472.796
	29.8507
	175.665
	286.324
	55.0828
	468
	187.5
	949.672
	386.516
	246.637
	318.615
	242.593
	248.812
	786.058
Mann-Whitney test, Normal tissues (32 cases), Tumor tissues (309 cases)
