# Supplementary material for: RUNX2 isoform II protects cancer cells from ferroptosis and apoptosis by promoting PRDX2 expression in oral squamous cell carcinoma
Source: eLife journal article supplement (doi:10.7554/elife.99122), 2024-09-06
Supplement: fig1-data1 [file fig1-data2.xlsx]

## Sheet: Sheet1
Normal	Tumor
0	0.7715
0.2179	0.9672
0.1516	0.2646
0	0.2188
0.239	0.2385
0.2405	0.9825
0.8488	0
0.1134	0.2377
0	0.0562
0.8651	0.9411
0.4328	0.7755
0	0.4513
0	1
0.2655	0.4168
0.4328	0.1979
0.3283	0.9032
0.0395	0.4634
0.2121	0.6721
0.2121	0.5352
0.5801	0.661
0.3153	0.1062
0.1357	0.1226
0.8651	0.7755
0.1727	0.1173
0.0634	0.6678
0	0.3445
0.2107	0.6327
	0.5894
	0.6646
	0.2588
	0.3478
	0.1717
	0.168
	0.4341
	0.5161
	0.2491
	0.334
	0.4715
	0.3016
	0
	0
	0.3114
	0.175
	0.6482
	0.4634
	0.59
	0.3654
	0.4342
	0.5622
	0.8012
	0.8218
	0.1214
	0.5352
	0.3862
	0.1258
	0.5416
	0.8382
	0.4463
	0.0906
	0.6333
	0.1585
	0.2567
	0.5408
	0.5911
	0
	0.293
	0.6492
	0.6517
	0.562
	0.3968
	0.3153
	0.5108
	0.1656
	0.7566
	0.0209
	0.0654
	0.3153
	0.42
	0.4295
	0.1173
	0.3016
	0.1357
	0.0483
	0.251
	0.3219
	0
	0.3787
	0.1412
	0
	0.3262
	0.4504
	0.4114
	0.1993
	0.3757
	0.5159
	0.3773
	0.1336
	0.3838
	0.2043
	0.1081
	0.3834
	0.3916
	0.5308
	0.4634
	0
	0
	0.6333
	0.1979
	0.2567
	0.0693
	0
	0.0807
	0.5352
	0
	0.6834
	0
	0.5834
	0.5031
	0.1098
	0.5065
	0.2143
	0.269
	0.1064
	0.347
	0.3016
	0.387
	0.5089
	0.0974
	0.6204
	0.2408
	0
	0
	0.5246
	0
	0.0591
	0.149
	0.4086
	0.2336
	0.2317
	0.3146
	0.2074
	0.3233
	0.1924
	0.5303
	0.2414
	0.3406
	0.0641
	0.3654
	0
	0
	0.2089
	0.0779
	0.3393
	0.4967
	0.4398
	0.0581
	0.3968
	0.3064
	0.6263
	0.5995
	0.3323
	0.7879
	0.3544
	0.2567
	0.4897
	0.0671
	0.2235
	0.5066
	0.0795
	0.171
	0.5986
	0.3952
	0.0544
	0.3441
	0.4634
	0
	0.2701
	0.6834
	0.4468
	0.5352
	0.1979
	0.4967
	0.7265
	0
	0.7825
	0.285
	0.8261
	0.3016
	0.7422
	0
	0.7265
	0.4676
	0.9128
	0.7514
	0.2591
	0
	0.3202
	0.7307
	0.2939
	0.3202
	0.2942
	0.2826
	0.2533
	0
	0.1173
	0.3259
	0.1979
	0.3546
	0
	0.4663
	0.1243
	0.231
	0.0917
	0.2329
	0.3654
	0.4634
	0
	0.3529
	0.2188
	0
	0.3242
	0.1979
	0.0875
	0.3542
	0.3947
	0.0671
	0.0267
	0.1498
	0
	0.0536
	0.6333
	0.4111
	0.5352
	0.6834
	0.6745
	0.0974
	0.9244
	0.6333
	0
	0.4178
	0.2135
	0.7499
	0.5352
	0.1979
	0.0395
	0.3931
	0.285
	0.2277
	0.4342
	0.8636
	0.9384
	0.3578
	0
	0.2268
	0.4026
	0
	0.6129
	0.7839
	0.0795
	0.7215
	0.5331
	0.4013
	0.12
	0.7475
	0.7422
	0.9007
	0.5494
	0.5561
	0.1002
	0.9839
	0.7796
	0.1872
	0.8382
	0.2505
	0.38
	0.5352
	0.6659
	0.7215
	0.8261
	0.5953
	0.239
	0.7859
	0.8091
	0.6333
	0.9725
	0.9714
	0.5436
	0.4839
Unpaired t test, Normal tissues (27 cases), Tumor tissues (288 cases)
