# Supplementary material for: RUNX2 isoform II protects cancer cells from ferroptosis and apoptosis by promoting PRDX2 expression in oral squamous cell carcinoma
Source: eLife journal article supplement (doi:10.7554/elife.99122), 2024-09-06
Supplement: fig1-data1 [file fig1-data4.xlsx]

## Sheet: Sheet1
Clinical stage I+II+III	Clinical stage IV
0.2646	0.7715
0.2377	0.9672
1	0.2188
0.1226	0.2385
0.1173	0.9825
0.5894	0.0562
0.2588	0.9411
0.2491	0.7755
0.334	0.4513
0.4634	0.4168
0.8012	0.1979
0.1258	0.9032
0.5408	0.6721
0.293	0.5352
0.6492	0.661
0.562	0.1062
0.5108	0.7755
0.7566	0.3445
0.1357	0.6327
0.3262	0.6646
0.2043	0.168
0.5352	0.4341
0	0.5161
0.5834	0.4715
0.1064	0.3016
0.347	0
0.387	0.175
0	0.6482
0.0591	0.3654
0.149	0.4342
0.4086	0.5622
0.5303	0.1214
0.4897	0.3862
0.4634	0.5416
0.2701	0.8382
0.7265	0.3968
0	0.0654
0	0.3153
0.3259	0.42
0.1979	0.4295
0.4663	0.3016
0.231	0.0483
0.3654	0.251
0.4634	0.3219
0	0
0.2188	0.3787
0.1498	0
0.0536	0.4504
0.6834	0.4114
0	0.1993
0.5352	0.3757
0.1979	0.5159
0	0.3773
0.12	0.3838
0.7475	0.1081
0.1872	0.3916
0.2505	0.4634
0.0693	0
0	0
0.4634	0.6333
0.6678	0.1979
0.3478	0.2567
0.1717	0
0	0.0807
0.3114	0.6834
0.59	0.5031
0.8218	0.1098
0.5352	0.269
0.4463	0.5089
0.0906	0.0974
0.6333	0.6204
0.1585	0.2408
0.2567	0
0.5911	0.5246
0	0.2414
0.6517	0.3406
0.3153	0.0641
0.1656	0.3654
0.0209	0.0779
0.1173	0.4967
0.1412	0.0581
0.1336	0.3968
0.3834	0.7879
0.5308	0.3544
0	0.2235
0.5065	0.5066
0.2143	0.171
0.3016	0.5986
0	0.0544
0.2336	0.3441
0.2317	0.4468
0.3146	0.5352
0.2074	0.1979
0.3233	0.4967
0.1924	0.7825
0	0.285
0	0.3016
0.2089	0
0.3393	0.9128
0.4398	0.7514
0.3064	0.3202
0.6263	0.7307
0.5995	0.1173
0.3323	0.3546
0.2567	0.1243
0.0671	0.0917
0.0795	0.3529
0.3952	0
0	0.3242
0.6834	0.1979
0.8261	0.0875
0.7422	0.3947
0.7265	0.0671
0.4676	0.0267
0.2591	0.6333
0.2939	0.4111
0.3202	0.5352
0.2942	0.6745
0.2826	0.0974
0.2533	0.6333
0	0.2135
0	0.7499
0.2329	0.0395
0.3542	0.3931
0	0.285
0.9244	0.4342
0.4178	0.8636
0.2277	0.9384
0.3578	0.2268
0.5352	0.4026
0.5436	0
0.4839	0.6129
	0.7839
	0.0795
	0.7215
	0.5331
	0.4013
	0.7422
	0.9007
	0.5494
	0.5561
	0.1002
	0.9839
	0.7796
	0.8382
	0.38
	0.6659
	0.7215
	0.8261
	0.5953
	0.239
	0.7859
	0.8091
	0.6333
	0.9725
	0.9714
Unpaired t test, I+II+II (132 cases), IV (156 cases)
