# Supplementary material for: RUNX2 isoform II protects cancer cells from ferroptosis and apoptosis by promoting PRDX2 expression in oral squamous cell carcinoma
Source: eLife journal article supplement (doi:10.7554/elife.99122), 2024-09-06
Supplement: fig1-data1 [file fig1-data7.xlsx]

## Sheet: Sheet1
Normal	Tumor
0.628328	0.516559
0.01951	0.552204
0.550236	1.15498
0.59061	0.491763
0.164396	0.268547
0.182268	0.350765
0.113869	0.231742
0.136759	1.16511
0.025205	0.696415
0.282866	1.03152
0.018982	0.70638
Unpaired t test, Normal or Tumor tissues (11 cases)
