# Supplementary material for: RUNX2 isoform II protects cancer cells from ferroptosis and apoptosis by promoting PRDX2 expression in oral squamous cell carcinoma
Source: eLife journal article supplement (doi:10.7554/elife.99122), 2024-09-06
Supplement: fig1-data1 [file fig1-data8.xlsx]

## Sheet: Sheet1
Normal	Tumor
0.547134	0.783142
0.051966	1.46723
0.236417	0.548381
0.302744	0.310503
0.465347	0.568959
0.272855	0.546126
0.106964	0.297911
0.744235	3.97437
0.007351	0.973194
0.416756	1.16046
0.012087	0.22733
Mann-Whitney test , Normal or Tumor tissues (11 cases)
