# Supplementary material for: RUNX2 isoform II protects cancer cells from ferroptosis and apoptosis by promoting PRDX2 expression in oral squamous cell carcinoma
Source: eLife journal article supplement (doi:10.7554/elife.99122), 2024-09-06
Supplement: fig1-figsupp2-data1 [file fig1-figsupp2-data1.xlsx]

## Sheet: exon 1.1
Normal	Tumor
0.7509	0.721
0.6678	0.7929
0.1255	0.7357
0.7471	0.7099
0.1685	0.7491
0	0.7417
0.5083	0.0088
0.147	0.7233
0.1096	0.725
0.1357	0.5346
0.0758	0.6079
0.5795	0.8318
0.3548	0.7908
0.3299	0.7485
0	0.349
0.1607	0.9042
0	0.5688
0	0.8257
0.1513	0.6926
0.2121	0.3648
0	0.9599
0.1607	0.9234
0.2628	0.7001
0.344	0.6327
0.147	0.9361
0.092	0.9478
0.0503	0.8915
0	0.8548
0.103	0.8701
0.5517	0.6333
0.2054	0.6327
0.3794	0.7985
0.1772	0.414
0.3863	0.9383
0.2874	0.4298
0.0645	0.8382
0.2427	0.937
0	0.6327
0.06	0.8527
0	0.8612
0	0.8438
0	0.4421
0	0.8135
0	0.5346
0.141	0.2385
0.4392	0.4812
0.35	0.7899
0.0511	0.5727
0.1354	0.9168
0.226	0.7312
0	0.6289
0.2385	0.7579
0.3524	0.6327
0.6327	0.0737
0.3299	0.5873
0.8411	0.8858
0.1685	0.8116
0.1685	0.8146
0.2331	0.8208
0.2563	0.7155
0.3648	0.6829
0.2331	0.4628
0.3264	0.896
0.4628	0.7628
0	0.8315
0.117	0.5577
0.408	0.7666
0.0361	0.8199
0	0.8711
0.3101	1
0.2175	0.0845
0.3465	0.9156
0.3648	0.7007
0.6123	0.7367
0.117	0.5718
0.2014	0.6327
0.408	0.8178
0.2404	0.6267
0.1819	0.7291
0.2825	0.6998
0.1772	0.8283
0.5473	0.7634
0.1303	0.4812
0.147	0.4449
0.4429	0.3992
0.1658	0.5948
0	0.2696
0.1931	0.678
0.0737	0.8045
0.0831	0.7001
0.0543	0.649
0.1303	0.4295
0.2769	0.6168
0.1868	0.4162
0.4298	0.1134
0.5185	0.6653
0.3895	0.5523
0.2769	0.6982
0.161	0.8412
	0.6327
	0.4744
	0.8508
	0.1279
	0.1473
	0.357
	0.7296
	1
	0.4776
	0.7664
	0.6433
	0.3259
	0.1813
	0.5607
	0.3075
	0.1552
	0.9441
	0.1906
	0.5872
	0.5824
	0.8552
	0.7982
	0.8824
	0.9118
	0.8224
	0.7476
	0.9045
	0.4337
	0.7295
	0.605
	0.5582
	0.8538
	0.4528
	0.6942
	0.5502
	0.6195
	0.5881
	0.5962
	0.6327
	0.7095
	0.7539
	0.1775
	0.1689
	0.4803
	0.6972
	0.1878
	0.5039
	0.8032
	0.3795
	0.4676
	0.2438
	0.6503
	0.9894
	0.9462
	0.8344
	0.7903
	0.5068
	0.6582
	0.7539
	0.6617
	0.8499
	0.7909
	0.8093
	0.721
	0.6327
	0.8921
	0.7751
	0.3925
	0.7794
	0.854
	0.5382
	0.9782
	0.7187
	0.7409
	0.423
	0.7406
	0.6793
	0.9078
	0.6327
	0.8517
	0.6527
	0.6166
	0.8165
	0.3344
	0.8129
	0.7949
	0.2794
	0.6972
	0.8379
	0.499
	0.8063
	0.6678
	0.7509
	0.844
	0.7405
	0.708
	0.5962
	0.8609
	0.605
	0.7944
	0.8578
	0.7075
	0.2541
	0.7954
	0.8667
	0.75
	0.721
	0.4247
	0.7368
	0.5765
	0.9034
	0.8697
	0.3684
	0.6052
	0.5567
	0.581
	0.6706
	0.7751
	0.7014
	0.5685
	0.7801
	0.8275
	0.408
	0.2349
	0.6967
	0.7243
	0.7002
	0.9735
	0.7682
	0.8379
	0.9127
	0.5872
	0.8685
	0.6469
	0.6967
	0.8479
	0.7357
	0.5984
	0.7317
	0.7702
	0.8193
	0.698
	0.7972
	0.8086
	0.3098
	0.1509
	0.2641
	0.5152
	0.5517
	0.3465
	0.0793
	0.239
	0.7374
	0.5997
	0.5176
	0.9972
	0.6972
	0.676
	0.4236
	0.3344
	0.8571
	0.921
	0.9719
	1
	0.6782
	0.7007
	0.5098
	0.7328
	0.3016
	0
	0.8417
	0.7755
	0.8162
	0.8312
	0.8075
	0.7453
	0.2769
	0.5594
	0.7949
	0.9247
	0.6789
	0.4534
	0.458
	0.9218
	0.823
	0.7194
	0.8164
	0.5989
	0.6457
	0.678
	1
	0.8451
	0.8578
	0.6711
	0.8001
	0.4744
	0.8296
	0.664
	0.669
	0.5582
	0.8379
	0.3407
	0.9295
	0.788
	0.9823
	0.8835
	0.2784
	0.7777
	0.7893
	0.4934
	0.8379
	0.8195
	0.6776
	0.7582
	0.8379
	0.7963
	0.918
	0.7966
	0.7359
	0.8228
	0.6999
	0.5544
	0.9424
	0.9424
	0.9147
	0.6557
	0.8306
	0.7824
	0.7002
	0.7462
	0.727
	0.5727
	0.8896
	0.8171
	0.4939
	0.8517
	0.4628
	0
	0.8967
	0.8297
	0.147
	0.301
	0.5264
	0.5637
	0.832
	0.8212
	0
	0.9823
	0.1535
	0.6559
	0.7995
	0.7779
	0.7081
	0.4444
	0.9053
	0.7522
	0.83
	0.2471
	0.7312
	0.9585
	0
	0.2789
	0.8603
	0.5244
	0.7798
	0.8933
	0.7191
	0.9199
	0.164
	0.9935
	0.6469
	0.35
	0.6001
	0
	0.4052
	0.7551
	1
	0.5742
	0.3809
	0.5774
	0.7562
	0.5949
	0.4477
	0.2725
	0.2898
	0.6759
	0.8226
	0.4486
	0.7303
	0.2814
	0.8036
	0.5277
	0.7603
	0.9001
	0.4795
	0.7485
	0.8124
	0.9244
	0.9192
	0.1651
	0.5706
	0.5069
	0.6114
	0.7602
	0.5395
	0.5312
	0.7492
	0.7751
	0.5915
	0.5743
	0.6259
	0.783
	0.5116
	0.7625
	0.639
	0.4856
	0.7448
	0.7283
	0.7869
	0.4188
	0.7378
	0.6644
	0.1079
	0.6505
	0.7178
	0.7664
	0.5962
	0.3925
	0.6939
	0.6239
	0.6504
	0.6242
	0.6632
	0.3568
	0.5193
	0.2961
	0.4086
	0.5879
	0.733
	0.7332
	0.7755
	0.5795
	0.9324
	0.4503
	0.6067
	0.4725
	1
	0.4486
	0.3925
	0.7975
	0.4129
	0.543
	0.909
	0.3999
	0.5637
	0.1835
	0.8774
	0.2175
	0.6219
	0.4247
	0.9282
	0.9042
	0.0457
	0.5451
	0.8884
	0.8465
	0.7751
	0.3985
	0.887
	0.482
	0.2769
	0.4179
	0.7691
	0.8793
	0.2611
	0.7966
	0.84
	0.4429
	0.9797
	0.721
	0.7417
	0.721
	1
	0.8645
	0.4001
	0.8071
	0.8639
	0.6814
	0.4429
	0.0553
	0.4454
	0.7274
	0.9256
	0.6333
	0.9396
	0.8885
	0.7605
	0.6327
	0.8244
	0.7691
	0.9514
	0.7983
	0.9746
	0.5326
	0.7733
	0.6449
	0.7422
	0.7036
	0.6895
	0.8286
	0.7687
	0.7402
	0.4812
	0.8116
	0.301
	0.8555
	0.914
	0.7359
	0.7069
	0.9701
	0.8081
	0.8902
	0.7835
	0.8946
	0
	0.9065
	0.6498
	0.3197
	0.791
	0.3781
	0.6768
	0.5255
	0.4961
	0.568
	0.806
	0.719
	0.7562
	0.6787
	0.6678
	0.6446
	0.8222
	0.8257
	0.6176
	0.8162
	0.2563
	0.8078
	0.949
	0.9914
	0.8116
	0.937
	1
	0.9095
	0.6038
	0.4715
	0.8436
	0.6546
	0.7056
	0.8288
	0.8722
	0.5517
	0.8868
	0.5561
	0.9167
	0.6885
	0.5833
	0.9445
	0.9214
	0.8561
	0.7837
	0.3137
	0.1173
	0.3476
	0.5795
	0.7137
	0.678
	0.8116
	0.9037
	0.9188
	0.6176
	0.6848
	0.8537
	0.8392
	0.8234
	0.5871
	0.918
	0.8212
	0.8309
	0.8139
	0.9086
	0
	0.5882
	0.1835
	0.8522
	0.5283
	0.7608
	0.8697
	0.8245
	0.6844
	0.3484
	0.8357
	0.667
	0.7514
	0.7691
	0.746
	0.7436
	0.1728
	0.7532
	0.7069
	0.524
	0.835
	0.7161
	0.4337
	0.7956
	0.7698
	0.8653
	0.4544
	0.5789
	0.9155
	0.5812
	0.7961
	0.9153
	0.7831
	0.7127
	0.721
	0.6684
	0.8171
	0.7751
	0.8379
	0.5942
	0.7464
	0.8358
	0.4324
	0.2766
	0.7327
	0.7925
	0.421
	0.3714
	0.5886
	0.9027
	0.7949
	0.5131
	0.5033
	0.6297
	0.1308
	0.8791
	0.5989
	0.092
	0.8414
	0.7422
	0.7129
	0.6543
	0.86
	0.7032
	0.7604
	0.3952
	1
	0.832
	0.8165
	0.9058
	0.6636
	0.1062
	0.7687
	0.8595
	0.7631
	0.9771
	0.7257
	0.9451
	0.9832
	0.9176
	0.888
	0.7032
	0.8757
	0.1772
	0.8819
	0.6653
	0.3278
	0.9259
	0.9167
	0.8441
	0.7251
	0.6083
	0.4071
	0.6667
	0.7424
	0.5155
	0.3582
	0.6637
	0.4382
	0.8053
	0.6162
	0.7226
	0.8733
	0.2525
	0.3762
	0.7891
	0.4057
	0.4312
	0.7514
	0.712
	0.5614
	0.5437
	0.8597
	0.7048
	0.5989
	0.721
	0.7589
	0.8367
	0.8744
	0.7133
	0.8563
	0
	0.8335
	0.7417
	0.5124
	0
	0.9539
	0.9124
	0.8432
	0.8141
	0.7847
	0.7417
	0.1372
	0.7763
	0.2479
	0.6557
	0.6252
	0.067
	0.419
	0.7717
	0.5795
	0.9324
	0.5001
	0.7835
	0.7645
	0.5517
	0.805
	0.7331
	0.7329
	1
	0.2409
	0.8318
	0.7645
	0.2432
	0.8143
	0.9573
	0.9361
	0.8777
	0.8586
	0.874
	0.6916
	0.4477
	0.5012
	0.6923
	0.6094
	0.8427
	0.7499
	0.7994
	0.7473
	0.5027
	0.7776
	0
	0.2216
	0.0891
	0.7729
	0.7918
	0.8142
	0.7869
	0.9282
	0.6834
	0.8149
	0.7394
	0.3444
	0.8228
	0.9624
	0.6757
	0.5856
	0.4628
	0.7069
	0.5544
	0.792
	1
	0.9234
	0.8428
	0.0922
	0.6582
	0.8346
	0.6998
	0.2769
	0.7855
	0.4891
	0.8938
	0.8481
	0.8204
	0.1868
	0.8858
	0.6327
	0.6075
	0.6238
	0.8274
	0.9056
	0.4001
	0.1835
	0.6926
	0.6073
	0.7509
	0.914
	0.7887
	0.685
	0.8683
	0.5833
	0.8078
	0.6498
	0.1772
	0.4789
	0.4628
	0.7533
	0.9292
	0.9684
	0.4628
	1
	0.8092
	0.7903
	0.6327
	0.9754
	0.8534
	0.9354
	0.539
	0.8633
	0.6724
	0.9372
	0.5565
	0.6632
	0.7491
	0.7869
	0.7907
	0.9157
	0.9903
	0.7843
	0.852
	0.7069
	0.7887
	0.8517
	1
	0.8671
	0.8382
	0.7853
	0.4879
	0.8147
	0.9738
	0.8216
	0.858
	0.6829
	0.9438
	0.4486
	0.8142
	0.7772
	0.8455
	0.1525
	0.7577
	0.7499
	0.9243
	0.5255
	0.4167
	0.8812
	0.8604
	0.6771
	0.8266
	0.2884
	0.544
	0.3587
	0.7695
	0.6114
	0.7474
	0.5506
	0.5795
	0.3775
	0.8485
	0.654
	0.6383
	0.7861
	0.7646
	0.8063
	0.7303
	0.8504
	0.3688
	0.6415
	0.6993
	0.7796
	0.8761
	0.83
	0.918
	0.9414
	0.5637
	0.3407
	0.8821
	0.8026
	0.8485
	0.8189
	0.6003
	0.2231
	0.6327
	0.5833
	0.7628
	0.1728
	0.3931
	0.2194
	0.4634
	0.9107
	0.3648
	0.9283
	0.6492
	0
	0.6967
	0.5293
	0.6896
	0.6082
	0.6123
	0.3925
	0.6765
	0.916
	0.1274
	0.338
	0.7975
	0.8558
	0.523
	0.7032
	0.7966
	0.7459
	0.693
	0.8748
	0.301
	0.8593
	0.5556
	0.5894
	0.6653
	0.5637
	0.2655
	0.5805
	0.6731
	0.6106
	0.5637
	0.7361
	0.7437
	0.6926
	0.5824
	0.8542
	0.5161
	0.3202
	0.6637
	0.623
	0.6559
	0.6527
	0.7887
	0.4818
	0.6253
	0.7096
	0.8309
	0.8941
	0.9354
	0.6327
	0.8008
	0.7929
	0.9248
	0.4628
	0.6327
	0.9234
	0.9011
	0.0166
	0.8189
	0.59
	0.9615
	0.3202
	0.5425
	0.3931
	0.9671
	0.1186
	0.3749
	0.6333
	0.6137
	0.8517
	0.3299
	0.4392
	0.6527
	0.7338
	0.2951
	0.1258
	0
	0.9236
	0.9896
	0.9182
	0.852
	0.6931
	0.8735
	0.9324
	0.9832
	0.662
	0.6498
	0.8084
	0.6527
	0.8786
	0.952
	0.896
	0.7037
	0.525
	0.4435
	0.6745
	0.6551
	0.6551
	0.3654
	0.1338
	0.8636
	0.1786
	0.5303
	0.9876
	0.3016
	0.759
	0.8488
	0.7873
	1
	0.7751
	0.7649
	0.6327
	0.8612
	0.5881
	0.6401
	0.8735
	0.642
	0.3815
	0.3799
	0.3852
	0.6327
	0.5751
	0.7577
	0.7245
	0.1632
	0.6327
	0.4012
	0.6771
	0.6632
	0.4063
	0.5322
	0.3572
	0.3197
	0.9312
	0.7649
	0.9704
	1
	0.5496
	0.6379
	0.896
	0.6876
Unpaired t test, Normal tissues (99 cases), Tumor tissues (1050 cases)

## Sheet: exon 2.1
Normal	Tumor
0.2491	0.279
0.3322	0.2071
0.8745	0.2643
0.2529	0.2901
0.8315	0.2509
1	0.2583
0.4917	0.9912
0.853	0.2767
0.8904	0.2749
0.8643	0.4654
0.9242	0.3921
0.4205	0.1682
0.6452	0.2092
0.6701	0.2515
1	0.651
0.8393	0.0958
1	0.4312
1	0.1743
0.8487	0.3074
0.7879	0.6352
1	0.0401
0.8393	0.0766
0.7372	0.2999
0.656	0.3673
0.853	0.0639
0.908	0.0522
0.9497	0.1085
1	0.1452
0.897	0.1299
0.4483	0.3667
0.7946	0.3673
0.6206	0.2015
0.8228	0.586
0.6137	0.0617
0.7126	0.5702
0.9355	0.1618
0.7573	0.063
1	0.3673
0.94	0.1473
1	0.1388
1	0.1562
1	0.5579
1	0.1865
1	0.4654
0.859	0.7615
0.5608	0.5188
0.65	0.2101
0.9489	0.4274
0.8646	0.0832
0.774	0.2688
1	0.3711
0.7615	0.2421
0.6476	0.3673
0.3673	0.9263
0.6701	0.4127
0.1589	0.1142
0.8315	0.1884
0.8315	0.1854
0.7669	0.1792
0.7437	0.2845
0.6352	0.3171
0.7669	0.5372
0.6736	0.104
0.5372	0.2372
1	0.1685
0.883	0.4423
0.592	0.2334
0.9639	0.1801
1	0.1289
0.6899	0
0.7825	0.9155
0.6535	0.0844
0.6352	0.2993
0.3877	0.2633
0.883	0.4282
0.7986	0.3673
0.592	0.1822
0.7596	0.3733
0.8181	0.2709
0.7175	0.3002
0.8228	0.1717
0.4527	0.2366
0.8697	0.5188
0.853	0.5551
0.5571	0.6008
0.8342	0.4052
1	0.7304
0.8069	0.322
0.9263	0.1955
0.9169	0.2999
0.9457	0.351
0.8697	0.5705
0.7231	0.3832
0.8132	0.5838
0.5702	0.8866
0.4815	0.3347
0.6105	0.4477
0.7231	0.3018
0.839	0.1588
	0.3673
	0.5256
	0.1492
	0.8721
	0.8527
	0.643
	0.2704
	0
	0.5224
	0.2336
	0.3567
	0.6741
	0.8187
	0.4393
	0.6925
	0.8448
	0.0559
	0.8094
	0.4128
	0.4176
	0.1448
	0.2018
	0.1176
	0.0882
	0.1776
	0.2524
	0.0955
	0.5663
	0.2705
	0.395
	0.4418
	0.1462
	0.5472
	0.3058
	0.4498
	0.3805
	0.4119
	0.4038
	0.3673
	0.2905
	0.2461
	0.8225
	0.8311
	0.5197
	0.3028
	0.8122
	0.4961
	0.1968
	0.6205
	0.5324
	0.7562
	0.3497
	0.0106
	0.0538
	0.1656
	0.2097
	0.4932
	0.3418
	0.2461
	0.3383
	0.1501
	0.2091
	0.1907
	0.279
	0.3673
	0.1079
	0.2249
	0.6075
	0.2206
	0.146
	0.4618
	0.0218
	0.2813
	0.2591
	0.577
	0.2594
	0.3207
	0.0922
	0.3673
	0.1483
	0.3473
	0.3834
	0.1835
	0.6656
	0.1871
	0.2051
	0.7206
	0.3028
	0.1621
	0.501
	0.1937
	0.3322
	0.2491
	0.156
	0.2595
	0.292
	0.4038
	0.1391
	0.395
	0.2056
	0.1422
	0.2925
	0.7459
	0.2046
	0.1333
	0.25
	0.279
	0.5753
	0.2632
	0.4235
	0.0966
	0.1303
	0.6316
	0.3948
	0.4433
	0.419
	0.3294
	0.2249
	0.2986
	0.4315
	0.2199
	0.1725
	0.592
	0.7651
	0.3033
	0.2757
	0.2998
	0.0265
	0.2318
	0.1621
	0.0873
	0.4128
	0.1315
	0.3531
	0.3033
	0.1521
	0.2643
	0.4016
	0.2683
	0.2298
	0.1807
	0.302
	0.2028
	0.1914
	0.6902
	0.8491
	0.7359
	0.4848
	0.4483
	0.6535
	0.9207
	0.761
	0.2626
	0.4003
	0.4824
	0.0028
	0.3028
	0.324
	0.5764
	0.6656
	0.1429
	0.079
	0.0281
	0
	0.3218
	0.2993
	0.4902
	0.2672
	0.6984
	1
	0.1583
	0.2245
	0.1838
	0.1688
	0.1925
	0.2547
	0.7231
	0.4406
	0.2051
	0.0753
	0.3211
	0.5466
	0.542
	0.0782
	0.177
	0.2806
	0.1836
	0.4011
	0.3543
	0.322
	0
	0.1549
	0.1422
	0.3289
	0.1999
	0.5256
	0.1704
	0.336
	0.331
	0.4418
	0.1621
	0.6593
	0.0705
	0.212
	0.0177
	0.1165
	0.7216
	0.2223
	0.2107
	0.5066
	0.1621
	0.1805
	0.3224
	0.2418
	0.1621
	0.2037
	0.082
	0.2034
	0.2641
	0.1772
	0.3001
	0.4456
	0.0576
	0.0576
	0.0853
	0.3443
	0.1694
	0.2176
	0.2998
	0.2538
	0.273
	0.4274
	0.1104
	0.1829
	0.5061
	0.1483
	0.5372
	1
	0.1033
	0.1703
	0.853
	0.699
	0.4736
	0.4363
	0.168
	0.1788
	1
	0.0177
	0.8465
	0.3441
	0.2005
	0.2221
	0.2919
	0.5556
	0.0947
	0.2478
	0.17
	0.7529
	0.2688
	0.0415
	1
	0.7211
	0.1397
	0.4756
	0.2202
	0.1067
	0.2809
	0.0801
	0.836
	0.0065
	0.3531
	0.65
	0.3999
	1
	0.5948
	0.2449
	0
	0.4258
	0.6191
	0.4226
	0.2438
	0.4051
	0.5523
	0.7275
	0.7102
	0.3241
	0.1774
	0.5514
	0.2697
	0.7186
	0.1964
	0.4723
	0.2397
	0.0999
	0.5205
	0.2515
	0.1876
	0.0756
	0.0808
	0.8349
	0.4294
	0.4931
	0.3886
	0.2398
	0.4605
	0.4688
	0.2508
	0.2249
	0.4085
	0.4257
	0.3741
	0.217
	0.4884
	0.2375
	0.361
	0.5144
	0.2552
	0.2717
	0.2131
	0.5812
	0.2622
	0.3356
	0.8921
	0.3495
	0.2822
	0.2336
	0.4038
	0.6075
	0.3061
	0.3761
	0.3496
	0.3758
	0.3368
	0.6432
	0.4807
	0.7039
	0.5914
	0.4121
	0.267
	0.2668
	0.2245
	0.4205
	0.0676
	0.5497
	0.3933
	0.5275
	0
	0.5514
	0.6075
	0.2025
	0.5871
	0.457
	0.091
	0.6001
	0.4363
	0.8165
	0.1226
	0.7825
	0.3781
	0.5753
	0.0718
	0.0958
	0.9543
	0.4549
	0.1116
	0.1535
	0.2249
	0.6015
	0.113
	0.518
	0.7231
	0.5821
	0.2309
	0.1207
	0.7389
	0.2034
	0.16
	0.5571
	0.0203
	0.279
	0.2583
	0.279
	0
	0.1355
	0.5999
	0.1929
	0.1361
	0.3186
	0.5571
	0.9447
	0.5546
	0.2726
	0.0744
	0.3667
	0.0604
	0.1115
	0.2395
	0.3673
	0.1756
	0.2309
	0.0485
	0.2017
	0.0254
	0.4674
	0.2267
	0.3551
	0.2578
	0.2964
	0.3105
	0.1714
	0.2313
	0.2598
	0.5188
	0.1884
	0.699
	0.1445
	0.086
	0.2641
	0.2931
	0.0299
	0.1919
	0.1098
	0.2165
	0.1054
	1
	0.0935
	0.3502
	0.6803
	0.209
	0.6219
	0.3232
	0.4745
	0.5039
	0.432
	0.194
	0.281
	0.2438
	0.3213
	0.3322
	0.3554
	0.1778
	0.1743
	0.3824
	0.1838
	0.7437
	0.1922
	0.051
	0.0086
	0.1884
	0.063
	0
	0.0905
	0.3962
	0.5285
	0.1564
	0.3454
	0.2945
	0.1712
	0.1278
	0.4483
	0.1132
	0.4439
	0.0833
	0.3115
	0.4167
	0.0555
	0.0786
	0.1438
	0.2163
	0.6863
	0.8827
	0.6524
	0.4205
	0.2863
	0.322
	0.1884
	0.0963
	0.0812
	0.3824
	0.3152
	0.1463
	0.1608
	0.1766
	0.4129
	0.082
	0.1788
	0.1691
	0.1861
	0.0914
	1
	0.4118
	0.8165
	0.1478
	0.4717
	0.2392
	0.1303
	0.1755
	0.3156
	0.6516
	0.1643
	0.333
	0.2486
	0.2309
	0.254
	0.2564
	0.8272
	0.2468
	0.2931
	0.476
	0.165
	0.2839
	0.5663
	0.2044
	0.2302
	0.1347
	0.5456
	0.4211
	0.0845
	0.4188
	0.2039
	0.0847
	0.2169
	0.2873
	0.279
	0.3316
	0.1829
	0.2249
	0.1621
	0.4058
	0.2536
	0.1642
	0.5676
	0.7234
	0.2673
	0.2075
	0.579
	0.6286
	0.4114
	0.0973
	0.2051
	0.4869
	0.4967
	0.3703
	0.8692
	0.1209
	0.4011
	0.908
	0.1586
	0.2578
	0.2871
	0.3457
	0.14
	0.2968
	0.2396
	0.6048
	0
	0.168
	0.1835
	0.0942
	0.3364
	0.8938
	0.2313
	0.1405
	0.2369
	0.0229
	0.2743
	0.0549
	0.0168
	0.0824
	0.112
	0.2968
	0.1243
	0.8228
	0.1181
	0.3347
	0.6722
	0.0741
	0.0833
	0.1559
	0.2749
	0.3917
	0.5929
	0.3333
	0.2576
	0.4845
	0.6418
	0.3363
	0.5618
	0.1947
	0.3838
	0.2774
	0.1267
	0.7475
	0.6238
	0.2109
	0.5943
	0.5688
	0.2486
	0.288
	0.4386
	0.4563
	0.1403
	0.2952
	0.4011
	0.279
	0.2411
	0.1633
	0.1256
	0.2867
	0.1437
	1
	0.1665
	0.2583
	0.4876
	1
	0.0461
	0.0876
	0.1568
	0.1859
	0.2153
	0.2583
	0.8628
	0.2237
	0.7521
	0.3443
	0.3748
	0.933
	0.581
	0.2283
	0.4205
	0.0676
	0.4999
	0.2165
	0.2355
	0.4483
	0.195
	0.2669
	0.2671
	0
	0.7591
	0.1682
	0.2355
	0.7568
	0.1857
	0.0427
	0.0639
	0.1223
	0.1414
	0.126
	0.3084
	0.5523
	0.4988
	0.3077
	0.3906
	0.1573
	0.2501
	0.2006
	0.2527
	0.4973
	0.2224
	1
	0.7784
	0.911
	0.2271
	0.2082
	0.1858
	0.2131
	0.0718
	0.3166
	0.1851
	0.2606
	0.6556
	0.1772
	0.0376
	0.3243
	0.4144
	0.5372
	0.2931
	0.4456
	0.208
	0
	0.0766
	0.1572
	0.9078
	0.3418
	0.1654
	0.3002
	0.7231
	0.2145
	0.5109
	0.1062
	0.1519
	0.1796
	0.8132
	0.1142
	0.3673
	0.3925
	0.3762
	0.1726
	0.0944
	0.5999
	0.8165
	0.3074
	0.3927
	0.2491
	0.086
	0.2113
	0.315
	0.1317
	0.4167
	0.1922
	0.3502
	0.8228
	0.5211
	0.5372
	0.2467
	0.0708
	0.0316
	0.5372
	0
	0.1908
	0.2097
	0.3673
	0.0246
	0.1466
	0.0646
	0.461
	0.1367
	0.3276
	0.0628
	0.4435
	0.3368
	0.2509
	0.2131
	0.2093
	0.0843
	0.0097
	0.2157
	0.148
	0.2931
	0.2113
	0.1483
	0
	0.1329
	0.1618
	0.2147
	0.5121
	0.1853
	0.0262
	0.1784
	0.142
	0.3171
	0.0562
	0.5514
	0.1858
	0.2228
	0.1545
	0.8475
	0.2423
	0.2501
	0.0757
	0.4745
	0.5833
	0.1188
	0.1396
	0.3229
	0.1734
	0.7116
	0.456
	0.6413
	0.2305
	0.3886
	0.2526
	0.4494
	0.4205
	0.6225
	0.1515
	0.346
	0.3617
	0.2139
	0.2354
	0.1937
	0.2697
	0.1496
	0.6312
	0.3585
	0.3007
	0.2204
	0.1239
	0.17
	0.082
	0.0586
	0.4363
	0.6593
	0.1179
	0.1974
	0.1515
	0.1811
	0.3997
	0.7769
	0.3673
	0.4167
	0.2372
	0.8272
	0.6069
	0.7806
	0.5366
	0.0893
	0.6352
	0.0717
	0.3508
	1
	0.3033
	0.4707
	0.3104
	0.3918
	0.3877
	0.6075
	0.3235
	0.084
	0.8726
	0.662
	0.2025
	0.1442
	0.477
	0.2968
	0.2034
	0.2541
	0.307
	0.1252
	0.699
	0.1407
	0.4444
	0.4106
	0.3347
	0.4363
	0.7345
	0.4195
	0.3269
	0.3894
	0.4363
	0.2639
	0.2563
	0.3074
	0.4176
	0.1458
	0.4839
	0.6798
	0.3363
	0.377
	0.3441
	0.3473
	0.2113
	0.5182
	0.3747
	0.2904
	0.1691
	0.1059
	0.0646
	0.3673
	0.1992
	0.2071
	0.0752
	0.5372
	0.3673
	0.0766
	0.0989
	0.9834
	0.1811
	0.41
	0.0385
	0.6798
	0.4575
	0.6069
	0.0329
	0.8814
	0.6251
	0.3667
	0.3863
	0.1483
	0.6701
	0.5608
	0.3473
	0.2662
	0.7049
	0.8742
	1
	0.0764
	0.0104
	0.0818
	0.148
	0.3069
	0.1265
	0.0676
	0.0168
	0.338
	0.3502
	0.1916
	0.3473
	0.1214
	0.048
	0.104
	0.2963
	0.475
	0.5565
	0.3255
	0.3449
	0.3449
	0.6346
	0.8662
	0.1364
	0.8214
	0.4697
	0.0124
	0.6984
	0.241
	0.1512
	0.2127
	0
	0.2249
	0.2351
	0.3673
	0.1388
	0.4119
	0.3599
	0.1265
	0.358
	0.6185
	0.6201
	0.6148
	0.3673
	0.4249
	0.2423
	0.2755
	0.8368
	0.3673
	0.5988
	0.3229
	0.3368
	0.5937
	0.4678
	0.6428
	0.6803
	0.0688
	0.2351
	0.0296
	0
	0.4504
	0.3621
	0.104
	0.3124
Unpaired t test, Normal tissues (99 cases), Tumor tissues (1050 cases)
