# Supplementary material for: RUNX2 isoform II protects cancer cells from ferroptosis and apoptosis by promoting PRDX2 expression in oral squamous cell carcinoma
Source: eLife journal article supplement (doi:10.7554/elife.99122), 2024-09-06
Supplement: fig1-figsupp2-data1 [file fig1-figsupp2-data2.xlsx]

## Sheet: exon 1.1
Normal	Tumor
0	0.0395
0.1306	0
0	0.7402
0.0528	0
0.2099	0
0	0.1067
0.0512	0.87
0	0.0477
0	0.357
0.1134	0.0267
0	0.1505
0.1979	0.1258
0	0
0	0.358
0	0
0	0
0.0464	0.4086
0	0.4634
0	0.1357
0.1098	0.1228
0.0922	0
0.0601	0.59
0	0.1357
0	0
0	0.1775
0	0.0698
0	0.0922
0	0.2968
0	0
0	0.039
0.1357	0
0	0.1258
0	0.1979
0	0
0.1357	0.0617
0.0404	0.4634
0.1473	0.5546
0.1538	0.2951
0	0.076
	0.7274
	0
	0
	0.4435
	0.539
	0
	0.0328
	0
	0
	0.1979
	0
	0
	0
	0.0667
	0
	0
	0.2434
	0
	0.231
	0
	0
	0.1729
	0.2949
	0
	0
	0.8541
	0
	0.2336
	0.2567
	0.0646
	0
	0
	0
	0.2058
	0.2336
	0
	0.1979
	0.1525
	0.4086
	0
	0.5968
	0
	0.0623
	0
	0.7215
	0
	0.1473
	0.161
	0
	0
	0
	0
	0
	0.1002
	0.0354
	0.2336
	0.4818
	0.1053
	0.1906
	0
	0.161
	0
	0
	0.5352
	0.0497
	0.2798
	0
	0.3426
	0.5824
	0
	0
	0.3654
	0.1357
	0.0875
	0.1053
	0.2132
	0
	0.0544
	0
	0.2475
	0
	0
	0.2701
	0.1979
	0.1775
	0
	0
	0.2627
	0.1258
	0
	0.4897
	0.1959
	0.1979
	0
	0.1852
	0
	0.7074
	0.1357
	0.3259
	0
	0.2235
	0.2666
	0.1775
	0.3083
	0
	0.0581
	0
	0.7074
	0.0386
	0.161
	0.1473
	0.1516
	0.285
	0.1173
	0.2235
	0.1173
	0.5705
	0.1384
	0.1473
	0.174
	0.3016
	0.3016
	0.3931
	0.2336
	0
	0.0544
	0
	0
	0.6931
	0.161
	0.0728
	0.2408
	0.2008
	0.1258
	0.3202
	0.1872
	0.0922
	0.8488
	0.4253
	0.1412
	0.2235
	0
	0
	0.6333
	0
	0.0289
	0.1258
	0
	0.0744
	0.4086
	0
	0.1979
	0.0993
	0.2701
	0.1689
	0
	0.2188
	0
	0.2914
	0.1032
	0.4634
	0.4634
	0.4338
	0.1173
	0.2037
	0
	0.2923
	0.4463
	0.0771
	0.7274
	0
	0
	0.2567
	0.5643
	0.4373
	0.1935
	0.0974
	0
	0
	0
	0.1122
	0.0974
	0
	0.1538
	0
	0.2074
	0
	0.5607
	0.0685
	0.1886
	0.2773
	0
	0.2475
	0.2773
	0.0698
	0.1668
	0
	0
	0
	0.0255
	0
	0.278
Mann-Whitney test , Normal tissues (39 cases), Tumor tissues (241 cases)

## Sheet: exon 2.1
Normal	Tumor
1	0.9605
0.8694	1
1	0.2598
0.9472	1
0.7901	1
1	0.8933
0.9488	0.13
1	0.9523
1	0.643
0.8866	0.9733
1	0.8495
0.8021	0.8742
1	1
1	0.642
1	1
1	1
0.9536	0.5914
1	0.5366
1	0.8643
0.8902	0.8772
0.9078	1
0.9399	0.41
1	0.8643
1	1
1	0.8225
1	0.9302
1	0.9078
1	0.7032
1	1
1	0.961
0.8643	1
1	0.8742
1	0.8021
1	1
0.8643	0.9383
0.9596	0.5366
0.8527	0.4454
0.8462	0.7049
1	0.924
	0.2726
	1
	1
	0.5565
	0.461
	1
	0.9672
	1
	1
	0.8021
	1
	1
	1
	0.9333
	1
	1
	0.7566
	1
	0.769
	1
	1
	0.8271
	0.7051
	1
	1
	0.1459
	1
	0.7664
	0.7433
	0.9354
	1
	1
	1
	0.7942
	0.7664
	1
	0.8021
	0.8475
	0.5914
	1
	0.4032
	1
	0.9377
	1
	0.2785
	1
	0.8527
	0.839
	1
	1
	1
	1
	1
	0.8997
	0.9646
	0.7664
	0.5182
	0.8947
	0.8094
	1
	0.839
	1
	1
	0.4648
	0.9503
	0.7202
	1
	0.6574
	0.4176
	1
	1
	0.6346
	0.8643
	0.9125
	0.8947
	0.7868
	1
	0.9456
	1
	0.7525
	1
	1
	0.7299
	0.8021
	0.8225
	1
	1
	0.7373
	0.8742
	1
	0.5103
	0.8041
	0.8021
	1
	0.8148
	1
	0.2926
	0.8643
	0.6741
	1
	0.7765
	0.7334
	0.8225
	0.6917
	1
	0.9419
	1
	0.2926
	0.9614
	0.839
	0.8527
	0.8484
	0.715
	0.8827
	0.7765
	0.8827
	0.4295
	0.8616
	0.8527
	0.826
	0.6984
	0.6984
	0.6069
	0.7664
	1
	0.9456
	1
	1
	0.3069
	0.839
	0.9272
	0.7592
	0.7992
	0.8742
	0.6798
	0.8128
	0.9078
	0.1512
	0.5747
	0.8588
	0.7765
	1
	1
	0.3667
	1
	0.9711
	0.8742
	1
	0.9256
	0.5914
	1
	0.8021
	0.9007
	0.7299
	0.8311
	1
	0.7812
	1
	0.7086
	0.8968
	0.5366
	0.5366
	0.5662
	0.8827
	0.7963
	1
	0.7077
	0.5537
	0.9229
	0.2726
	1
	1
	0.7433
	0.4357
	0.5627
	0.8065
	0.9026
	1
	1
	1
	0.8878
	0.9026
	1
	0.8462
	1
	0.7926
	1
	0.4393
	0.9315
	0.8114
	0.7227
	1
	0.7525
	0.7227
	0.9302
	0.8332
	1
	1
	1
	0.9745
	1
	0.722
Mann-Whitney test , Normal tissues (39 cases), Tumor tissues (241 cases)
