# Supplementary material for: RUNX2 isoform II protects cancer cells from ferroptosis and apoptosis by promoting PRDX2 expression in oral squamous cell carcinoma
Source: eLife journal article supplement (doi:10.7554/elife.99122), 2024-09-06
Supplement: fig1-figsupp2-data1 [file fig1-figsupp2-data3.xlsx]

## Sheet: exon 1.1
Normal	Tumor
0	0
0	0
0	0
0	0.1775
0.0362	0
0.0728	0.7402
0	0.3654
0	0.0939
0.0217	0
0	0
0.0728	0
0.0623	0
0	0
0.0612	0
0	0.0544
0	0.1979
0	0.0795
0	0
0	0
0	0
0	0.0334
0	0
0	0.0251
0	0
0.013	0
0.0795	0
0.0248	0.2463
0	0.1258
0	0
0	0.1173
0	0
0	0
0.0354	0.0875
0	0.0544
0.1173	0.1979
0	0.0195
0	0.0454
0	0.0833
0	0
0.0424	0
0	0
0	0
0	0.0209
0	0
0	0
0	0
0	0.1032
0	0.0581
0	0
0.0569	0
	0
	0.0483
	0
	0.3546
	0
	0
	0.1134
	0
	0
	0
	0.1473
	0
	0
	0
	0
	0
	0
	0.0354
	0.0271
	0
	0
	0.1032
	0
	0
	0
	0
	0.1412
	0
	0
	0
	0
	0.0581
	0.1872
	0.0275
	0.2666
	0.161
	0
	0.4634
	0
	0
	0
	0.4185
	0
	0.1473
	0.0795
	0
	0
	0
	0
	0.1384
	0.0623
	0
	0
	0.1032
	0.0601
	0.1098
	0
	0
	0.0528
	0.1258
	0
	0.1689
	0
	0
	0.1979
	0
	0
	0
	0
	0
	0
	0
	0
	0
	0
	0.1134
	0
	0
	0
	0
	0
	0.0768
	0
	0
	0
	0
	0
	0
	0
	0
	0
	0
	0.0833
	0
	0.5592
	0
	0
	0
	0.0234
	0.0922
	0
	0
	0
	0
	0
	0.0728
	0
	0.3991
	0.0483
	0.5783
	0
	0.1258
	0.2357
	0
	0.1775
	0
	0.2773
	0
	0.0875
	0.3654
	0
	0
	0
	0.2366
	0.1838
	0
	0.1872
	0
	0
	0
	0
	0
	0.076
	0
	0.1098
	0.1098
	0
	0
	0
	0
	0
	0
	0.273
	0.4222
	0.3654
	0
	0
	0
	0
	0.0623
	0
	0
	0
	0
	0
	0.1357
	0
	0.1473
	0
	0
	0.4634
	0.3304
	0.1979
	0
	0.1173
	0.2143
	0
	0.5523
	0.0961
	0
	0
	0.1473
	0
	0.1979
	0
	0.1134
	0
	0
	0.0833
	0
	0.2567
	0
	0
	0
	0.0698
	0
	0
	0
	0
	0
	0.0446
	0
	0
	0
	0
	0.2567
	0
	0.031
	0
	0
	0
	0
	0
	0
	0.1473
	0
	0
	0
	0
	0.076
	0
	0
	0
	0.3654
	0
	0
	0
	0
	0
	0
	0
	0
	0
	0
	0
	0.0159
	0
	0.2099
	0
	0.3931
	0
	0
	0
	0
	0
	0
	0
	0.4086
	0
	0.1775
	0.3529
	0
	0
	0
	0.2099
	0
	0.4342
	0
	0
	0
	0.0623
	0
	0.0671
	0
	0
	0
	0.2235
	0.1473
	0
	0
	0
	0
	0.0922
	0.2567
	0
	0.0922
	0
	0
	0.0795
	0.1012
Mann-Whitney test , Normal tissues (50 cases), Tumor tissues (320 cases)

## Sheet: exon 2.1
Normal	Tumor
1	1
1	1
1	1
1	0.8225
0.9638	1
0.9272	0.2598
1	0.6346
1	0.9061
0.9783	1
1	1
0.9272	1
0.9377	1
1	1
0.9388	1
1	0.9456
1	0.8021
1	0.9205
1	1
1	1
1	1
1	0.9666
1	1
1	0.9749
1	1
0.987	1
0.9205	1
0.9752	0.7537
1	0.8742
1	1
1	0.8827
1	1
1	1
0.9646	0.9125
1	0.9456
0.8827	0.8021
1	0.9805
1	0.9546
1	0.9167
1	1
0.9576	1
1	1
1	1
1	0.9791
1	1
1	1
1	1
1	0.8968
1	0.9419
1	1
0.9431	1
	1
	0.9517
	1
	0.6454
	1
	1
	0.8866
	1
	1
	1
	0.8527
	1
	1
	1
	1
	1
	1
	0.9646
	0.9729
	1
	1
	0.8968
	1
	1
	1
	1
	0.8588
	1
	1
	1
	1
	0.9419
	0.8128
	0.9725
	0.7334
	0.839
	1
	0.5366
	1
	1
	1
	0.5815
	1
	0.8527
	0.9205
	1
	1
	1
	1
	0.8616
	0.9377
	1
	1
	0.8968
	0.9399
	0.8902
	1
	1
	0.9472
	0.8742
	1
	0.8311
	1
	1
	0.8021
	1
	1
	1
	1
	1
	1
	1
	1
	1
	1
	0.8866
	1
	1
	1
	1
	0.9232
	1
	1
	1
	1
	1
	1
	1
	1
	1
	1
	0.9167
	1
	0.4408
	1
	1
	1
	0.9766
	0.9078
	1
	1
	1
	1
	1
	0.9272
	1
	0.6009
	0.9517
	0.4217
	1
	0.8742
	0.7643
	1
	0.8225
	1
	0.7227
	1
	0.9125
	0.6346
	1
	1
	1
	0.7634
	0.8162
	1
	0.8128
	1
	1
	1
	1
	1
	0.924
	1
	0.8902
	0.8902
	1
	1
	1
	1
	1
	1
	0.727
	0.5778
	0.6346
	1
	1
	1
	1
	0.9377
	1
	1
	1
	1
	1
	0.8643
	1
	0.8527
	1
	1
	0.5366
	0.6696
	0.8021
	1
	0.8827
	0.7857
	1
	0.4477
	0.9039
	1
	1
	0.8527
	1
	0.8021
	1
	0.8866
	1
	1
	0.9167
	1
	0.7433
	1
	1
	1
	0.9302
	1
	1
	1
	1
	1
	0.9554
	1
	1
	1
	1
	0.7433
	1
	0.969
	1
	1
	1
	1
	1
	1
	0.8527
	1
	1
	1
	1
	0.924
	1
	1
	1
	0.6346
	1
	1
	1
	1
	1
	1
	1
	1
	1
	1
	1
	0.9841
	1
	0.7901
	1
	0.6069
	1
	1
	1
	1
	1
	1
	1
	0.5914
	1
	0.8225
	0.6471
	1
	1
	1
	0.7901
	1
	0.5658
	1
	1
	1
	0.9377
	1
	0.9329
	1
	1
	1
	0.7765
	0.8527
	1
	1
	1
	1
	0.9078
	0.7433
	1
	0.9078
	1
	1
	0.9205
	0.8988
	1
Mann-Whitney test , Normal tissues (50 cases), Tumor tissues (320 cases)
