# Supplementary material for: RUNX2 isoform II protects cancer cells from ferroptosis and apoptosis by promoting PRDX2 expression in oral squamous cell carcinoma
Source: eLife journal article supplement (doi:10.7554/elife.99122), 2024-09-06
Supplement: fig1-figsupp2-data1 [file fig1-figsupp2-data4.xlsx]

## Sheet: exon 1.1
Normal	Tumor
0	0
0	0.1255
0	0.614
0.0208	0.2534
0.0518	0.0947
0.0483	0.3761
0.0166	0.0858
0.1434	0.5275
0.0584	0
0.0344	0.8032
0.1068	0.2095
0.3582	0.0892
0.0752	0.4387
0	0.3582
0.0407	0.0529
0.0433	0.8379
0	0.1731
0.0773	0.0723
0.3582	0.4905
0.8072	0.5914
0	0.7751
0.1931	0.4337
0.1673	0.7751
0.1569	0.2925
0.1731	0.8379
0	0
0	0.5576
0	0
0.1271	0.0605
0.0851	0.4342
0.0543	0
	0.5159
	0.1646
	0.476
	0.1881
	0.2787
	0
	0.308
	0.5326
	0.4026
	0.1856
	0.2658
	0.3068
	0.2367
	0.2601
	0.2999
	0.0873
	0.3354
	0.3253
	0
	0
	0.33
	0.6819
	0.4557
	0
	0.5481
	0
	0.4942
	0.4735
	0.0554
	0.2482
	0
	0.0775
	0.0335
	0.4345
	0
	0.4053
	0.0322
	0.541
	0.1111
	0.1569
	0.1364
	0.0185
	0.1395
	0.0412
	0.0529
	0.0195
	0.1422
	0.2735
	0.0265
	0.2326
	0
	0.2418
	0.1584
	0.1225
	0.1606
	0.1157
	0.1972
	0.2648
	0.6261
	0
	0.2028
	0.0866
	0.1281
	0
	0.897
	0.3175
	0
	0.0237
	0.0318
	0
	0.9985
	0.2768
	0.2641
	0.08
	0.0367
	0.2136
	0.0412
	0
	0
	0.3582
	0.0791
	0.6819
	0.1082
	0.3381
	0
	0.5944
	0.0698
	0.4668
	0.6349
	0
	0.2958
	0.5227
	0.2085
	0
	0.1466
	0.2091
	0
	0
	0.2121
	0.1395
	0.1731
	0.1988
	0.4077
	0.5491
	0.1434
	0.081
	0.1452
	0.4126
	0.3247
	0.24
	0.489
	0.0698
	0.4126
	0.3021
	0.0663
	0
	0.0834
	0.1022
	0.2641
	0.0679
	0.3715
	0.2753
	0.2166
	0.2509
	0.1104
	0.1132
	0.4708
	0.4808
	0.2049
	0.3291
	0.479
	0.2331
	0.918
	0
	0.343
	0.0874
	0.4398
	0
	0.2662
	0.6527
	0.678
	0.2769
	0.1772
	0
	0.0874
	0.7949
	0.1255
	0.1211
	0.712
	0.4865
	0.0543
	0.0112
	0
	0.0966
	0.4191
	0
	0.0173
	0.0773
	0.2888
	0.4944
	0
	0
	0
	0
	0
	0.0402
	0.0433
	0.2827
	0.1968
	0.2074
	0.0283
	0.0507
	0.5197
	0.1348
	0
	0.1225
	0.0928
	0.0351
	0.239
	0
	0.0679
	0.1918
	0.3371
	0.0679
	0.0628
	0.0117
	0.1287
	0.1049
	0.0324
	0.0497
	0.0598
	0
	0
	0.0887
	0
	0.2113
	0.5447
	0.0652
	0.4935
	0.0961
	0.0652
	0
	0.6955
	0
	0.0987
	0
	0.3647
	0.2403
	0.701
	0.0953
	0.4557
	0
	0.0574
	0
	0.0968
	0.122
	0.0574
	0.06
	0
	0
	0
	0.1931
	0.1619
	0
	0
	0.1271
	0
	0
	0.1011
	0
	0.1485
	0
	0
	0
	0.2989
	0.2593
	0.0584
	0.0422
	0
	0
	0
	0.1271
	0
	0.2049
	0
	0.1434
	0.0928
	0.4349
	0
	0.352
	0
	0.3018
	0
	0.0866
	0
	0.0298
	0.2091
	0.1004
	0
	0.0989
	0.1321
	0.1278
	0.1225
	0
	0.1004
	0.0589
	0
	0.3116
	0
	0
	0
	0
	0
	0
	0
	0.1266
	0
	0
	0.1104
	0.5894
	0.1412
	0.1104
	0.2334
	0.0497
	0.0679
	0
	0.0113
	0
	0
	0.1387
	0.0791
	0
	0.3004
	0
	0
	0.2074
	0.0361
	0.0584
	0.1466
	0.1161
	0.3497
	0.1303
	0.1931
	0.208
	0.4424
	0
	0.0497
	0.0247
	0
	0.0992
	0.2827
	0
	0.5058
	0.3236
	0.1731
	0.5807
	0.0439
	0.0151
	0.1141
	0
	0
	0.0433
	0.0461
	0.3835
	0.103
	0.1245
	0
	0
	0.236
	0.4434
	0.1141
	0.2478
	0
	0.0295
	0.0445
	0
	0
	0.0141
	0
	0.1816
	0.0205
	0.1731
	0.086
	0.4066
	0.0564
	0
	0.3124
	0.0513
	0
	0.4624
	0
	0
	0.0285
	0.2782
	0.1092
	0.9766
	0
	0.0483
	0.0652
	0
	0.0791
	0
	0.0823
	0
	0.0723
	0.5212
Unpaired t test , Normal tissues (31 cases), Tumor tissues (397 cases)

## Sheet: exon 2.1
Normal	Tumor
1	1
1	0.8745
1	0.386
0.9792	0.7466
0.9482	0.9053
0.9517	0.6239
0.9834	0.9142
0.8566	0.4725
0.9416	1
0.9656	0.1968
0.8932	0.7905
0.6418	0.9108
0.9248	0.5613
1	0.6418
0.9593	0.9471
0.9567	0.1621
1	0.8269
0.9227	0.9277
0.6418	0.5095
0.1928	0.4086
1	0.2249
0.8069	0.5663
0.8327	0.2249
0.8431	0.7075
0.8269	0.1621
1	1
1	0.4424
1	1
0.8729	0.9395
0.9149	0.5658
0.9457	1
	0.4841
	0.8354
	0.524
	0.812
	0.7213
	1
	0.692
	0.4674
	0.5974
	0.8144
	0.7342
	0.6932
	0.7633
	0.7399
	0.7001
	0.9127
	0.6646
	0.6747
	1
	1
	0.67
	0.3181
	0.5443
	1
	0.4519
	1
	0.5058
	0.5265
	0.9446
	0.7518
	1
	0.9225
	0.9665
	0.5655
	1
	0.5947
	0.9678
	0.459
	0.8889
	0.8431
	0.8636
	0.9815
	0.8605
	0.9588
	0.9471
	0.9805
	0.8578
	0.7265
	0.9735
	0.7674
	1
	0.7582
	0.8416
	0.8775
	0.8394
	0.8843
	0.8028
	0.7352
	0.3739
	1
	0.7972
	0.9134
	0.8719
	1
	0.103
	0.6825
	1
	0.9763
	0.9682
	1
	0.0015
	0.7232
	0.7359
	0.92
	0.9633
	0.7864
	0.9588
	1
	1
	0.6418
	0.9209
	0.3181
	0.8918
	0.6619
	1
	0.4056
	0.9302
	0.5332
	0.3651
	1
	0.7042
	0.4773
	0.7915
	1
	0.8534
	0.7909
	1
	1
	0.7879
	0.8605
	0.8269
	0.8012
	0.5923
	0.4509
	0.8566
	0.919
	0.8548
	0.5874
	0.6753
	0.76
	0.511
	0.9302
	0.5874
	0.6979
	0.9337
	1
	0.9166
	0.8978
	0.7359
	0.9321
	0.6285
	0.7247
	0.7834
	0.7491
	0.8896
	0.8868
	0.5292
	0.5192
	0.7951
	0.6709
	0.521
	0.7669
	0.082
	1
	0.657
	0.9126
	0.5602
	1
	0.7338
	0.3473
	0.322
	0.7231
	0.8228
	1
	0.9126
	0.2051
	0.8745
	0.8789
	0.288
	0.5135
	0.9457
	0.9888
	1
	0.9034
	0.5809
	1
	0.9827
	0.9227
	0.7112
	0.5056
	1
	1
	1
	1
	1
	0.9598
	0.9567
	0.7173
	0.8032
	0.7926
	0.9717
	0.9493
	0.4803
	0.8652
	1
	0.8775
	0.9072
	0.9649
	0.761
	1
	0.9321
	0.8082
	0.6629
	0.9321
	0.9372
	0.9883
	0.8713
	0.8951
	0.9676
	0.9503
	0.9402
	1
	1
	0.9113
	1
	0.7887
	0.4553
	0.9348
	0.5065
	0.9039
	0.9348
	1
	0.3045
	1
	0.9013
	1
	0.6353
	0.7597
	0.299
	0.9047
	0.5443
	1
	0.9426
	1
	0.9032
	0.878
	0.9426
	0.94
	1
	1
	1
	0.8069
	0.8381
	1
	1
	0.8729
	1
	1
	0.8989
	1
	0.8515
	1
	1
	1
	0.7011
	0.7407
	0.9416
	0.9578
	1
	1
	1
	0.8729
	1
	0.7951
	1
	0.8566
	0.9072
	0.5652
	1
	0.648
	1
	0.6982
	1
	0.9134
	1
	0.9702
	0.7909
	0.8996
	1
	0.9011
	0.8679
	0.8722
	0.8775
	1
	0.8996
	0.9411
	1
	0.6884
	1
	1
	1
	1
	1
	1
	1
	0.8734
	1
	1
	0.8896
	0.4106
	0.8588
	0.8896
	0.7666
	0.9503
	0.9321
	1
	0.9887
	1
	1
	0.8613
	0.9209
	1
	0.6996
	1
	1
	0.7926
	0.9639
	0.9416
	0.8534
	0.8839
	0.6503
	0.8697
	0.8069
	0.792
	0.5576
	1
	0.9503
	0.9753
	1
	0.9008
	0.7173
	1
	0.4942
	0.6764
	0.8269
	0.4193
	0.9561
	0.9849
	0.8859
	1
	1
	0.9567
	0.9539
	0.6165
	0.897
	0.8755
	1
	1
	0.764
	0.5566
	0.8859
	0.7522
	1
	0.9705
	0.9555
	1
	1
	0.9859
	1
	0.8184
	0.9795
	0.8269
	0.914
	0.5934
	0.9436
	1
	0.6876
	0.9487
	1
	0.5376
	1
	1
	0.9715
	0.7218
	0.8908
	0.0234
	1
	0.9517
	0.9348
	1
	0.9209
	1
	0.9177
	1
	0.9277
	0.4788
Unpaired t test , Normal tissues (31 cases), Tumor tissues (397 cases)
