# Supplementary material for: RUNX2 isoform II protects cancer cells from ferroptosis and apoptosis by promoting PRDX2 expression in oral squamous cell carcinoma
Source: eLife journal article supplement (doi:10.7554/elife.99122), 2024-09-06
Supplement: fig1-figsupp2-data1 [file fig1-figsupp2-source data legends.docx]

**fig1-figsupp2-data1**. Original data corresponding to Figure 1-figure supplement 2A.

**fig1-figsupp2-data2**. Original data corresponding to Figure 1-figure supplement 2B.

**fig1-figsupp2-data3**. Original data corresponding to Figure 1-figure supplement 2C.

**fig1-figsupp2-data4**. Original data corresponding to Figure 1-figure supplement 2D.
