# Supplementary material for: RUNX2 isoform II protects cancer cells from ferroptosis and apoptosis by promoting PRDX2 expression in oral squamous cell carcinoma
Source: eLife journal article supplement (doi:10.7554/elife.99122), 2024-09-06
Supplement: fig2-data1 [file elife-99122-fig2-data1-v1.zip]

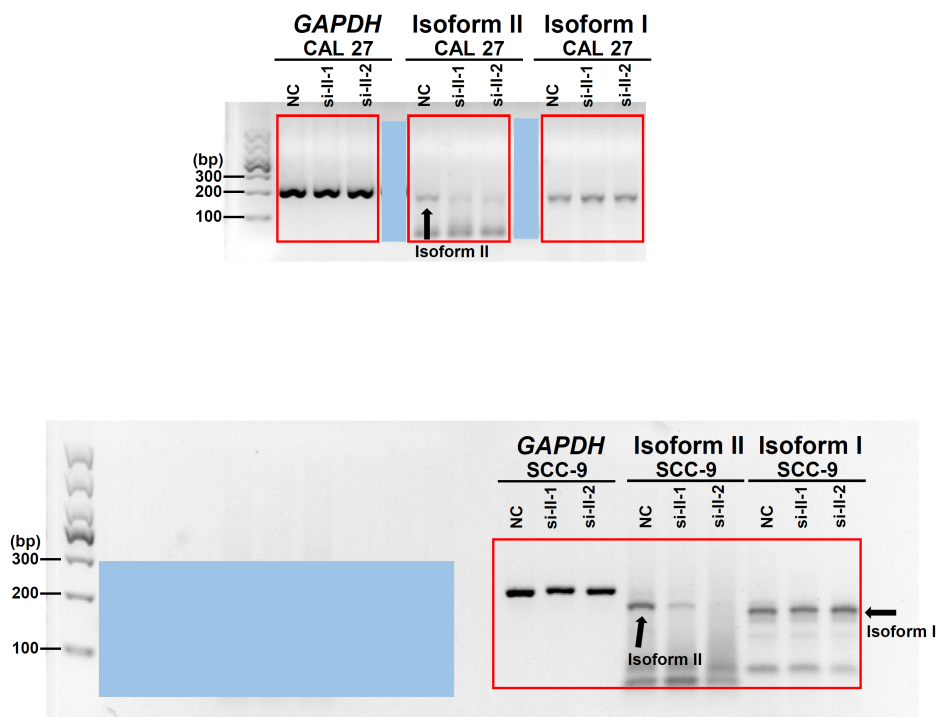

**Figure 2, Source Data 3.** Original RT-PCR images corresponding to Figure 2D. The upper or lower image corresponds to CAL 27 or SCC-9, respectively. *GAPDH* served as a loading control.
