# Supplementary material for: RUNX2 isoform II protects cancer cells from ferroptosis and apoptosis by promoting PRDX2 expression in oral squamous cell carcinoma
Source: eLife journal article supplement (doi:10.7554/elife.99122), 2024-09-06
Supplement: fig2-data1 [file elife-99122-fig2-data1-v1.zip]

**fig2-data1**. PDF file containing original western blot images for Figure 2B, indicating the relevant bands and treatments.

**fig2-data2**. Original files for western blot analysis displayed in Figure 2B.

**fig2-data3**. PDF file containing original RT-PCR images for Figure 2D, indicating the relevant bands and treatments.

**fig2-data4**. Original files for RT-PCR analysis displayed in Figure 2D.

**fig2-data5**. Original data corresponding to Figure 2E.

**fig2-data6**. Original data corresponding to Figure 2F.

**fig2-data7**. Original data corresponding to Figure 2H.

**fig2-data8**. PDF file containing original RT-PCR image for Figure 2J, indicating the relevant bands and treatments.

**fig2-data9**. Original file for RT-PCR analysis displayed in Figure 2J.
