# Supplementary material for: RUNX2 isoform II protects cancer cells from ferroptosis and apoptosis by promoting PRDX2 expression in oral squamous cell carcinoma
Source: eLife journal article supplement (doi:10.7554/elife.99122), 2024-09-06
Supplement: fig2-data1 [file fig2-data5.xlsx]

## Sheet: CAL 27
siNC	si-II-1	si-II-2
15	1	2
14	2	3
13	1	1
one-way ANOVA test, n=3. three biological replicates

## Sheet: SCC-9
siNC	si-II-1	si-II-2
144	44	92
169	68	103
197	66	115
one-way ANOVA test, n=3. three biological replicates
