# Supplementary material for: RUNX2 isoform II protects cancer cells from ferroptosis and apoptosis by promoting PRDX2 expression in oral squamous cell carcinoma
Source: eLife journal article supplement (doi:10.7554/elife.99122), 2024-09-06
Supplement: fig2-data1 [file fig2-data6.xlsx]

## Sheet: CAL 27
siNC	si-II-1	si-II-2
14.59	38.72	51.89
14.37	29.73	47.23
14.96	31.43	42.33
10.55	30.23	51.75
one-way ANOVA test, n=4. four biological replicates

## Sheet: SCC-9
siNC	si-II-1	si-II-2
14.64	36.08	20.63
13.4	34.5	28.76
14.11	25.22	33.53
one-way ANOVA test, n=3. three biological replicates
