# Supplementary material for: RUNX2 isoform II protects cancer cells from ferroptosis and apoptosis by promoting PRDX2 expression in oral squamous cell carcinoma
Source: eLife journal article supplement (doi:10.7554/elife.99122), 2024-09-06
Supplement: fig2-data1 [file fig2-data7.xlsx]

## Sheet: Sheet1
shNC	shisoform II-1
90	41
93	47
207	37
68	40
59	63
112	58
105	36
73	55
64	56
20	45
79	75
58	48
Mann-Whitney test, six mice per group, both sides of the dorsum of per nude mouse.
