# Supplementary material for: RUNX2 isoform II protects cancer cells from ferroptosis and apoptosis by promoting PRDX2 expression in oral squamous cell carcinoma
Source: eLife journal article supplement (doi:10.7554/elife.99122), 2024-09-06
Supplement: fig2-figsupp1-data1 [file elife-99122-fig2-figsupp1-data1-v1.zip]

**fig2-figsupp1-data1**. PDF file containing original western blot images for Figure 2-figure supplement 1B, indicating the relevant bands and treatments.

**fig2-figsupp1-data2**. Original files for western blot analysis displayed in Figure 2-figure supplement 1B.
