# Supplementary material for: RUNX2 isoform II protects cancer cells from ferroptosis and apoptosis by promoting PRDX2 expression in oral squamous cell carcinoma
Source: eLife journal article supplement (doi:10.7554/elife.99122), 2024-09-06
Supplement: fig2-figsupp2-data1 [file fig2-figsupp2-data1.xlsx]

## Sheet: Sheet1
Vector	Isoform II	Isoform I
48.2913	49.7389	36.4833
48.2136	44.1249	32.2538
48.2013	54.1613	36.1327
one-way ANOVA test, n=3. three biological replicates
