# Supplementary material for: RUNX2 isoform II protects cancer cells from ferroptosis and apoptosis by promoting PRDX2 expression in oral squamous cell carcinoma
Source: eLife journal article supplement (doi:10.7554/elife.99122), 2024-09-06
Supplement: fig2-figsupp2-data1 [file fig2-figsupp2-data2.xlsx]

## Sheet: Sheet1
Vector	Isoform II	Isoform I
682	879	568
858	841	593
878	795	559
one-way ANOVA test, n=3. three biological replicates
