# Supplementary material for: RUNX2 isoform II protects cancer cells from ferroptosis and apoptosis by promoting PRDX2 expression in oral squamous cell carcinoma
Source: eLife journal article supplement (doi:10.7554/elife.99122), 2024-09-06
Supplement: fig2-figsupp3-data1 [file fig2-figsupp3-data1.xlsx]

## Sheet: CAL 27
Vector	Isoform II	Isoform I
14.22	19.67	12.19
18.62	16.92	19.26
16.27	16.67	13.63
one-way ANOVA test, n=3. three biological replicates

## Sheet: SCC-9
Vector	Isoform II	Isoform I
4.46	4.73	4.91
4.38	3.24	5.88
4.27	3.74	4.16
one-way ANOVA test, n=3. three biological replicates
