# Supplementary material for: RUNX2 isoform II protects cancer cells from ferroptosis and apoptosis by promoting PRDX2 expression in oral squamous cell carcinoma
Source: eLife journal article supplement (doi:10.7554/elife.99122), 2024-09-06
Supplement: fig2-figsupp4-data1 [file fig2-figsupp4-data1.xlsx]

## Sheet: Sheet1
shNC	shisoform II-2
38	81
100	28
54	12
86	42
84	57
74	40
0	81
114	47
289	25
99	7
51	25
9	23
Mann-Whitney test, six mice per group, both sides of the dorsum of per nude mouse.
