# Supplementary material for: RUNX2 isoform II protects cancer cells from ferroptosis and apoptosis by promoting PRDX2 expression in oral squamous cell carcinoma
Source: eLife journal article supplement (doi:10.7554/elife.99122), 2024-09-06
Supplement: fig3-data1 [file elife-99122-fig3-data1-v1.zip]

**fig3-data1**. Original data corresponding to Figure 3A.

**fig3-data2**. Original data corresponding to Figure 3B.

**fig3-data3**. Original data corresponding to Figure 3C.

**fig3-data4**. Original data corresponding to Figure 3D.

**fig3-data5**. Original data corresponding to Figure 3H.

**fig3-data6**. Original data corresponding to Figure 3I.

**fig3-data7**. Original data corresponding to Figure 3J.

**fig3-data8**. Original data corresponding to Figure 3K.

**fig3-data9**. Original data corresponding to Figure 3L.
