# Supplementary material for: RUNX2 isoform II protects cancer cells from ferroptosis and apoptosis by promoting PRDX2 expression in oral squamous cell carcinoma
Source: eLife journal article supplement (doi:10.7554/elife.99122), 2024-09-06
Supplement: fig3-data1 [file fig3-data1.xlsx]

## Sheet: CAL 27
siNC(X104)	si-II-1(X104)	si-II-2(X104)
4.9082	13.5357	21.3513
4.2909	18.8658	21.6518
6.9082	17.8239	22.2945
6.4726	14.6984	23.6725
one-way ANOVA test, n=4. four biological replicates

## Sheet: SCC-9
siNC(X104)	si-II-1(X104)	si-II-2(X104)
19.9611	25.7945	26.295
19.71	24.2932	24.4984
18.3613	24.6023	26.3243
18.8	26.2215	25.381
one-way ANOVA test, n=4. four biological replicates
