# Supplementary material for: RUNX2 isoform II protects cancer cells from ferroptosis and apoptosis by promoting PRDX2 expression in oral squamous cell carcinoma
Source: eLife journal article supplement (doi:10.7554/elife.99122), 2024-09-06
Supplement: fig3-data1 [file fig3-data2.xlsx]

## Sheet: CAL 27
siNC(X103)	si-II-1(X103)	si-II-2(X103)
2.299	3.945	3.597
2.427	3.951	3.567
2.638	4.004	3.827
2.766	4.032	3.466
one-way ANOVA test, n=4. four biological replicates

## Sheet: SCC-9
siNC(X103)	si-II-1(X103)	si-II-2(X103)
4.203	6.49	7.961
4.368	8.338	10.422
3.87	6.644	7.698
one-way ANOVA test, n=3. three biological replicates
