# Supplementary material for: RUNX2 isoform II protects cancer cells from ferroptosis and apoptosis by promoting PRDX2 expression in oral squamous cell carcinoma
Source: eLife journal article supplement (doi:10.7554/elife.99122), 2024-09-06
Supplement: fig3-data1 [file fig3-data3.xlsx]

## Sheet: CAL 27
Vector(X104)	Isoform II(X104)
30.0092	21.7336
26.0495	22.5585
26.8789	21.473
29.9311	19.3813
Unpaired t test, n=4. four biological replicates

## Sheet: SCC-9
Vector(X104)	Isoform II(X104)
68.9	49.2
65.5	43.9
62.7	47.5
60.5	44.6
Unpaired t test, n=4. four biological replicates
