# Supplementary material for: RUNX2 isoform II protects cancer cells from ferroptosis and apoptosis by promoting PRDX2 expression in oral squamous cell carcinoma
Source: eLife journal article supplement (doi:10.7554/elife.99122), 2024-09-06
Supplement: fig3-data1 [file fig3-data4.xlsx]

## Sheet: CAL 27
Vector(X103)	Isoform II(X103)
2.938	2.379
3.058	2.578
3.114	2.632
3.045	2.698
Unpaired t test, n=4. four biological replicates

## Sheet: SCC-9
Vector(X103)	Isoform II(X103)
9.849	9.157
10.347	8.799
12.121	8.882
10.481	9.005
Unpaired t test, n=4. four biological replicates
