# Supplementary material for: RUNX2 isoform II protects cancer cells from ferroptosis and apoptosis by promoting PRDX2 expression in oral squamous cell carcinoma
Source: eLife journal article supplement (doi:10.7554/elife.99122), 2024-09-06
Supplement: fig3-data1 [file fig3-data5.xlsx]

## Sheet: Sheet1
DMSO(X104)			Fer-1(X104)
NC	si-II-1	si-II-2	NC	si-II-1	si-II-2
16.0692	23.5634	19.3551	13.8173	20.8032	15.9744
16.1222	26.6927	18.7963	14.5772	20.6863	16.4098
16.5188	26.2925	18.145	15.3155	20.2292	16.8199
one-way ANOVA test, n=3. three biological replicates
