# Supplementary material for: RUNX2 isoform II protects cancer cells from ferroptosis and apoptosis by promoting PRDX2 expression in oral squamous cell carcinoma
Source: eLife journal article supplement (doi:10.7554/elife.99122), 2024-09-06
Supplement: fig3-data1 [file fig3-data6.xlsx]

## Sheet: Sheet1
DMSO(X103)			Fer-1(X103)
NC	si-II-1	si-II-2	NC	si-II-1	si-II-2
4.849	6.286	7.18	3.38	3.959	4.976
4.769	5.859	7.143	3.289	4.227	4.387
4.85	6.32	6.742	3.599	4.09	4.08
one-way ANOVA test, n=3. three biological replicates
