# Supplementary material for: RUNX2 isoform II protects cancer cells from ferroptosis and apoptosis by promoting PRDX2 expression in oral squamous cell carcinoma
Source: eLife journal article supplement (doi:10.7554/elife.99122), 2024-09-06
Supplement: fig3-data1 [file fig3-data7.xlsx]

## Sheet: Sheet1
Vector(X104)		Isoform II(X104)
DMSO	RSL3	DMSO	RSL3
34.6461	50.1	27.6594	41.6
36.2025	52.6	26.2798	39.0387
34.3166	56	29.2456	44
37.6211	58.5	29.2523	41.8
one-way ANOVA test, n=4. four biological replicates
