# Supplementary material for: RUNX2 isoform II protects cancer cells from ferroptosis and apoptosis by promoting PRDX2 expression in oral squamous cell carcinoma
Source: eLife journal article supplement (doi:10.7554/elife.99122), 2024-09-06
Supplement: fig3-data1 [file fig3-data8.xlsx]

## Sheet: Sheet1
Vector(X103)		Isoform II(X103)
DMSO	RSL3	DMSO	RSL3
2.775	3.478	2.16	3.01
2.999	3.653	2.02	3.039
2.862	3.576	2.186	3.033
2.888	3.456	2.145	3.131
2.798	3.488	2.053	3.131
one-way ANOVA test, n=5. five biological replicates
