# Supplementary material for: RUNX2 isoform II protects cancer cells from ferroptosis and apoptosis by promoting PRDX2 expression in oral squamous cell carcinoma
Source: eLife journal article supplement (doi:10.7554/elife.99122), 2024-09-06
Supplement: fig3-data1 [file fig3-data9.xlsx]

## Sheet: Sheet1
shNC	shisoform II
98.5	102.55
27.23	134.26
121.62	128.98
101.71	119.51
126.06	148.49
16.79	149.37
90.33	124.41
90.59	131.7
Mann-Whitney test, n=8. eight biological replicates
