# Supplementary material for: RUNX2 isoform II protects cancer cells from ferroptosis and apoptosis by promoting PRDX2 expression in oral squamous cell carcinoma
Source: eLife journal article supplement (doi:10.7554/elife.99122), 2024-09-06
Supplement: fig3-figsupp2-data1 [file fig3-figsupp2-data1.xlsx]

## Sheet: Sheet1
siNC	si-II-1	si-II-2	RSL3
0.52	0.843333	0.743333	1.20333
0.483333	0.85	0.793333	1.02333
0.56	1.21667	0.913333	1.11667
one-way ANOVA test, n=3. three biological replicates
