# Supplementary material for: RUNX2 isoform II protects cancer cells from ferroptosis and apoptosis by promoting PRDX2 expression in oral squamous cell carcinoma
Source: eLife journal article supplement (doi:10.7554/elife.99122), 2024-09-06
Supplement: fig3-figsupp2-data1 [file fig3-figsupp2-data4.xlsx]

## Sheet: CAL 27
siNC	si-II-1	si-II-2
1	0.777909	0.684371
1	0.834924	0.704845
1	0.834416	0.84122
1	0.695454	0.716302
one-way ANOVA test, n=4. four biological replicates

## Sheet: SCC-9
siNC	si-II-1	si-II-2
1	0.68539	0.62567
1	0.845528	0.608549
1	0.917158	0.82656
1	0.844014	0.843955
one-way ANOVA test, n=4. four biological replicates
