# Supplementary material for: RUNX2 isoform II protects cancer cells from ferroptosis and apoptosis by promoting PRDX2 expression in oral squamous cell carcinoma
Source: eLife journal article supplement (doi:10.7554/elife.99122), 2024-09-06
Supplement: fig3-figsupp3-data1 [file elife-99122-fig3-figsupp3-data1-v1.zip]

**fig3-figsupp3-data1**. PDF file containing original RT-PCR image for Figure 3-figure supplement 3B, indicating the relevant bands and treatments.

**fig3-figsupp3-data2**. Original file for RT-PCR analysis displayed in Figure 3-figure supplement 3B.
