# Supplementary material for: RUNX2 isoform II protects cancer cells from ferroptosis and apoptosis by promoting PRDX2 expression in oral squamous cell carcinoma
Source: eLife journal article supplement (doi:10.7554/elife.99122), 2024-09-06
Supplement: fig3-figsupp5-data1 [file fig3-figsupp5-data1.xlsx]

## Sheet: Sheet1
DMSO			Z-VAD-fmk
siNC	si-II-1	si-II-2	siNC	si-II-1	si-II-2
3.52	6.58	13.81	1.73	4.33	9.72
2.95	5.68	11.79	1.79	4.18	9.06
2.91	6.22	12.44	1.38	4.28	9.33
one-way ANOVA test, n=3. three biological replicates
