# Supplementary material for: RUNX2 isoform II protects cancer cells from ferroptosis and apoptosis by promoting PRDX2 expression in oral squamous cell carcinoma
Source: eLife journal article supplement (doi:10.7554/elife.99122), 2024-09-06
Supplement: fig3-figsupp6-data1 [file elife-99122-fig3-figsupp6-data1-v1.zip]

**fig3-figsupp6-data1**. Original data corresponding to Figure 3-figure supplement 6.
