# Supplementary material for: RUNX2 isoform II protects cancer cells from ferroptosis and apoptosis by promoting PRDX2 expression in oral squamous cell carcinoma
Source: eLife journal article supplement (doi:10.7554/elife.99122), 2024-09-06
Supplement: fig3-figsupp6-data1 [file fig3-figsupp6-data1.xlsx]

## Sheet: Sheet1
Fer-1	Z-VAD	Fer-1+Z-VAD
23.4483	15.9769	60.9812
23.7179	15.3626	59.8628
27.1429	16.2877	63.8748
one-way ANOVA test, n=3. three biological replicates
