# Supplementary material for: RUNX2 isoform II protects cancer cells from ferroptosis and apoptosis by promoting PRDX2 expression in oral squamous cell carcinoma
Source: eLife journal article supplement (doi:10.7554/elife.99122), 2024-09-06
Supplement: fig3-figsupp7-data1 [file fig3-figsupp7-data1.xlsx]

## Sheet: CAL 27
DMSO(X104)	RSL3(X104)
34.7498	42.3
35.7115	43.5
39.041	43.9
38.2318	40.6
Unpaired t test, n=4. four biological replicates

## Sheet: SCC-9
DMSO(X104)	RSL3(X104)
31.8791	36.4818
32.2145	34.6705
32.9913	36.077
33.4633	38.5175
Unpaired t test, n=4. four biological replicates
