# Supplementary material for: RUNX2 isoform II protects cancer cells from ferroptosis and apoptosis by promoting PRDX2 expression in oral squamous cell carcinoma
Source: eLife journal article supplement (doi:10.7554/elife.99122), 2024-09-06
Supplement: fig3-figsupp7-data1 [file fig3-figsupp7-data2.xlsx]

## Sheet: CAL 27
DMSO(X103)	RSL3(X103)
2.864	3.881
3.217	4.133
3.377	4.369
3.313	4.299
Unpaired t test, n=4. four biological replicates

## Sheet: SCC-9
DMSO(X103)	RSL3(X103)
6.24	11.432
6.27	8.547
6.117	10.67
7.279	12.447
Unpaired t test, n=4. four biological replicates
