# Supplementary material for: RUNX2 isoform II protects cancer cells from ferroptosis and apoptosis by promoting PRDX2 expression in oral squamous cell carcinoma
Source: eLife journal article supplement (doi:10.7554/elife.99122), 2024-09-06
Supplement: fig4-data1 [file elife-99122-fig4-data1-v1.zip]

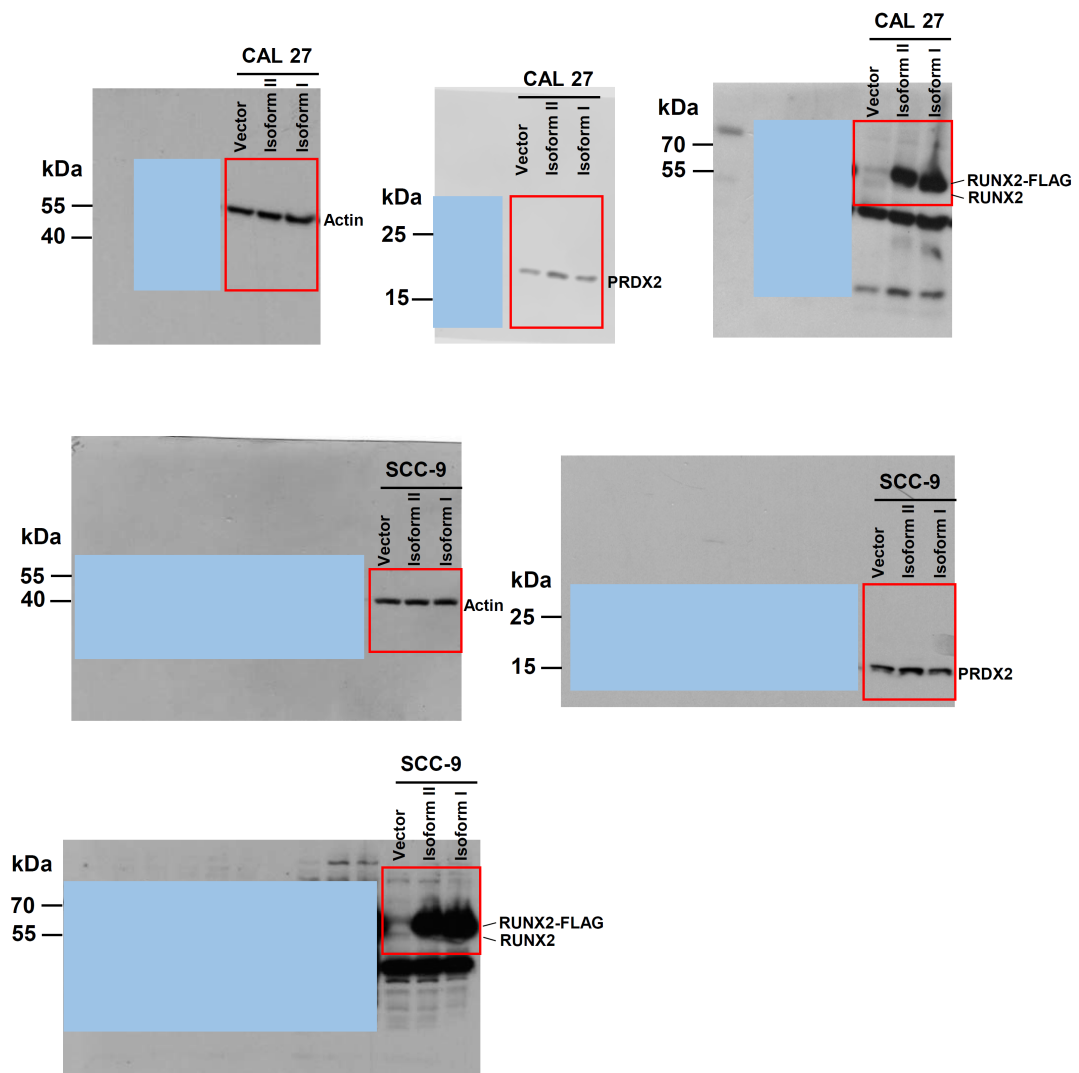

**Figure 4, Source Data 13.** Original Western blot images corresponding to Figure 4F. The upper three images correspond to CAL 27. The lower three images correspond to SCC-9. Actin served as a loading control.
