# Supplementary material for: RUNX2 isoform II protects cancer cells from ferroptosis and apoptosis by promoting PRDX2 expression in oral squamous cell carcinoma
Source: eLife journal article supplement (doi:10.7554/elife.99122), 2024-09-06
Supplement: fig4-data1 [file fig4-data5.xlsx]

## Sheet: CAL 27
siNC	si-II-1	si-II-2
1	0.662142	0.419531
1	0.742911	0.703739
1	0.616706	0.589551
one-way ANOVA test, n=3. three biological replicates

## Sheet: SCC-9
siNC	si-II-1	si-II-2
1	0.811351	0.625235
1	0.862611	0.73557
1	0.721035	0.688869
one-way ANOVA test, n=3. three biological replicates
