# Supplementary material for: RUNX2 isoform II protects cancer cells from ferroptosis and apoptosis by promoting PRDX2 expression in oral squamous cell carcinoma
Source: eLife journal article supplement (doi:10.7554/elife.99122), 2024-09-06
Supplement: fig4-data1 [file fig4-data8.xlsx]

## Sheet: CAL 27
siNC	si-II-1	si-II-2
1	0.714699	0.502535
1	0.6644	0.246345
1	0.671069	0.172087
one-way ANOVA test, n=3. three biological replicates

## Sheet: SCC-9
siNC	si-II-1	si-II-2
1	0.189223	0.186133
1	0.742595	0.698513
1	0.272236	0.150604
one-way ANOVA test, n=3. three biological replicates
