# Supplementary material for: RUNX2 isoform II protects cancer cells from ferroptosis and apoptosis by promoting PRDX2 expression in oral squamous cell carcinoma
Source: eLife journal article supplement (doi:10.7554/elife.99122), 2024-09-06
Supplement: fig4-data1 [file fig4-data9.xlsx]

## Sheet: Sheet1
shNC	shisoform II
163.19	89.22
157.44	90.75
173.05	113.21
143.89	146.96
Unpaired t test, n=4. four biological replicates
