# Supplementary material for: RUNX2 isoform II protects cancer cells from ferroptosis and apoptosis by promoting PRDX2 expression in oral squamous cell carcinoma
Source: eLife journal article supplement (doi:10.7554/elife.99122), 2024-09-06
Supplement: fig4-data1 [file fig4-data12.xlsx]

## Sheet: CAL 27
Vector	Isoform II	Isoform I
1	1.16715	0.991937
1	1.08537	0.931264
1	1.19772	1.05129
1	1.30925	0.987992
1	1.33065	1.04172
1	1.67135	0.952881
one-way ANOVA test, n=6. six biological replicates

## Sheet: SCC-9
Vector	Isoform II	Isoform I
1	1.19612	0.982552
1	1.40058	1.06132
1	1.19101	1.05194
one-way ANOVA test, n=3. three biological replicates
