# Supplementary material for: RUNX2 isoform II protects cancer cells from ferroptosis and apoptosis by promoting PRDX2 expression in oral squamous cell carcinoma
Source: eLife journal article supplement (doi:10.7554/elife.99122), 2024-09-06
Supplement: fig4-data1 [file fig4-data15.xlsx]

## Sheet: CAL 27
Vector	Isoform II	Isoform I
1	1.79356	0.361093
1	1.75221	1.02858
1	1.3923	1.13104
one-way ANOVA test, n=3. three biological replicates

## Sheet: SCC-9
Vector	Isoform II	Isoform I
1	1.28709	1.06751
1	1.75702	1.56551
1	1.77578	1.52867
one-way ANOVA test, n=3. three biological replicates
