# Supplementary material for: RUNX2 isoform II protects cancer cells from ferroptosis and apoptosis by promoting PRDX2 expression in oral squamous cell carcinoma
Source: eLife journal article supplement (doi:10.7554/elife.99122), 2024-09-06
Supplement: fig4-data1 [file fig4-data16.xlsx]

## Sheet: Sheet1
Vector		Isoform II
IgG	Anti-FLAG	IgG	Anti-FLAG
1	1.95542	1	5.61384
1	1.46861	1	4.31499
1	1.61396	1	5.12194
Unpaired t test, n=3. three biological replicates
