# Supplementary material for: RUNX2 isoform II protects cancer cells from ferroptosis and apoptosis by promoting PRDX2 expression in oral squamous cell carcinoma
Source: eLife journal article supplement (doi:10.7554/elife.99122), 2024-09-06
Supplement: fig4-data1 [file fig4-data19.xlsx]

## Sheet: Sheet1
Vector+siNC(X104)	Vector+si-II(X104)	PRDX2+siNC(X104)	PRDX2+si-II(X104)
15.683	21.3316	15.485	16.9098
15.053	18.2165	14.7101	16.3475
15.5439	19.4113	15.9748	16.0655
one-way ANOVA test, n=3. three biological replicates
