# Supplementary material for: RUNX2 isoform II protects cancer cells from ferroptosis and apoptosis by promoting PRDX2 expression in oral squamous cell carcinoma
Source: eLife journal article supplement (doi:10.7554/elife.99122), 2024-09-06
Supplement: fig4-data1 [file fig4-data20.xlsx]

## Sheet: Sheet1
Vector+siNC(X103)	Vector+si-II(X103)	PRDX2+siNC(X103)	PRDX2+si-II(X103)
2.762	5.297	2.617	4.516
2.721	5.048	3.103	4.262
2.931	5.158	3.266	4.308
one-way ANOVA test, n=3. three biological replicates
