# Supplementary material for: RUNX2 isoform II protects cancer cells from ferroptosis and apoptosis by promoting PRDX2 expression in oral squamous cell carcinoma
Source: eLife journal article supplement (doi:10.7554/elife.99122), 2024-09-06
Supplement: fig4-figsupp1-data1 [file elife-99122-fig4-figsupp1-data1-v1.zip]

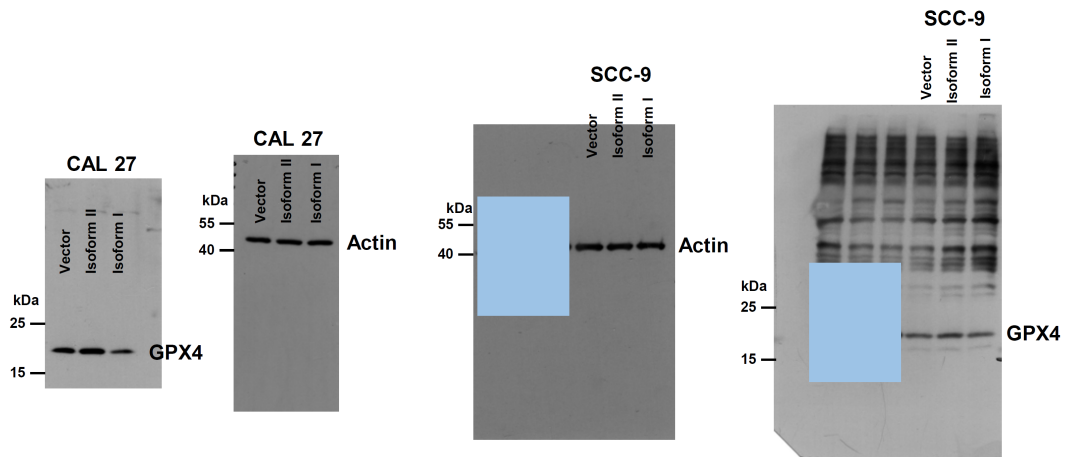

**Figure 4-figure supplement 1, Source Data 10.** Original Western blot images corresponding to Figure 4-figure supplement 1D. The two images on the left correspond to CAL 27. The two images on the right correspond to SCC-9. Actin served as a loading control.
