# Supplementary material for: RUNX2 isoform II protects cancer cells from ferroptosis and apoptosis by promoting PRDX2 expression in oral squamous cell carcinoma
Source: eLife journal article supplement (doi:10.7554/elife.99122), 2024-09-06
Supplement: fig4-figsupp1-data1 [file fig4-figsupp1-data3.xlsx]

## Sheet: CAL 27
siNC	si-II-1	si-II-2
1	0.774473	0.881519
1	0.731924	0.740196
1	0.780391	0.830618
one-way ANOVA test, n=3. three biological replicates

## Sheet: SCC-9
siNC	si-II-1	si-II-2
1	0.590085	0.604895
1	0.471503	0.491678
1	0.801071	0.513428
one-way ANOVA test, n=3. three biological replicates
