# Supplementary material for: RUNX2 isoform II protects cancer cells from ferroptosis and apoptosis by promoting PRDX2 expression in oral squamous cell carcinoma
Source: eLife journal article supplement (doi:10.7554/elife.99122), 2024-09-06
Supplement: fig4-figsupp1-data1 [file fig4-figsupp1-data6.xlsx]

## Sheet: CAL 27
siNC	si-II-1	si-II-2
1	0.525983	0.546333
1	0.574232	0.682659
1	0.451124	0.699029
one-way ANOVA test, n=3. three biological replicates

## Sheet: SCC-9
siNC	si-II-1	si-II-2
1	0.811828	0.655536
1	0.771274	0.704861
1	0.512661	0.54131
one-way ANOVA test, n=3. three biological replicates
