# Supplementary material for: RUNX2 isoform II protects cancer cells from ferroptosis and apoptosis by promoting PRDX2 expression in oral squamous cell carcinoma
Source: eLife journal article supplement (doi:10.7554/elife.99122), 2024-09-06
Supplement: fig4-figsupp1-data1 [file fig4-figsupp1-data9.xlsx]

## Sheet: CAL 27
Vector	Isoform II	Isoform I
1	1.12163	0.878809
1	1.23645	0.817193
1	1.26954	0.975335
one-way ANOVA test, n=3. three biological replicates

## Sheet: SCC-9
Vector	Isoform II	Isoform I
1	1.48333	0.394634
1	1.32055	0.738531
1	1.31881	0.72635
one-way ANOVA test, n=3. three biological replicates
