# Supplementary material for: RUNX2 isoform II protects cancer cells from ferroptosis and apoptosis by promoting PRDX2 expression in oral squamous cell carcinoma
Source: eLife journal article supplement (doi:10.7554/elife.99122), 2024-09-06
Supplement: fig4-figsupp1-data1 [file fig4-figsupp1-data12.xlsx]

## Sheet: CAL 27
Vector	Isoform II	Isoform I
1	1.20022	0.581452
1	1.3391	0.680739
1	1.24038	0.567663
one-way ANOVA test, n=3. three biological replicates

## Sheet: SCC-9
Vector	Isoform II	Isoform I
1	1.33169	0.988512
1	1.17259	1.24778
1	1.29722	1.03073
one-way ANOVA test, n=3. three biological replicates
