# Supplementary material for: RUNX2 isoform II protects cancer cells from ferroptosis and apoptosis by promoting PRDX2 expression in oral squamous cell carcinoma
Source: eLife journal article supplement (doi:10.7554/elife.99122), 2024-09-06
Supplement: fig4-figsupp2-data1 [file elife-99122-fig4-figsupp2-data1-v1.zip]

**fig4-figsupp2-data1**. Original data corresponding to Figure 4-figure supplement 2B.

**fig4-figsupp2-data2**. PDF file containing original western blot images for Figure 4-figure supplement 2D, indicating the relevant bands and treatments.

**fig4-figsupp2-data3**. Original files for western blot analysis displayed in Figure 4-figure supplement 2D.
