# Supplementary material for: RUNX2 isoform II protects cancer cells from ferroptosis and apoptosis by promoting PRDX2 expression in oral squamous cell carcinoma
Source: eLife journal article supplement (doi:10.7554/elife.99122), 2024-09-06
Supplement: fig4-figsupp2-data1 [file fig4-figsupp2-data1.xlsx]

## Sheet: Sheet1
shNC	shPRDX2-1	shPRDX2-2
57	11	22
35	0	10
22	54	74
194	159	29
112	31	21
39	20	44
425	19	13
42	21	25
120	17	0
100	21	14
391	35	10
301	74	14
Kruskal Wallis test, six mice per group, both sides of the dorsum of per nude mouse.
