# Supplementary material for: RUNX2 isoform II protects cancer cells from ferroptosis and apoptosis by promoting PRDX2 expression in oral squamous cell carcinoma
Source: eLife journal article supplement (doi:10.7554/elife.99122), 2024-09-06
Supplement: fig4-figsupp3-data1 [file elife-99122-fig4-figsupp3-data1-v1.zip]

**fig4-figsupp3-data1**. PDF file containing original RT-PCR images for Figure 4-figure supplement 3A, indicating the relevant bands and treatments.

**fig4-figsupp3-data2**. Original files for RT-PCR analysis displayed in Figure 4-figure supplement 3A.

**fig4-figsupp3-data3**. PDF file containing original western blot images for Figure 4-figure supplement 3B, indicating the relevant bands and treatments.

**fig4-figsupp3-data4**. Original files for western blot analysis displayed in Figure 4-figure supplement 3B.

**fig4-figsupp3-data5**. Original data corresponding to Figure 4-figure supplement 3C.
