# Supplementary material for: RUNX2 isoform II protects cancer cells from ferroptosis and apoptosis by promoting PRDX2 expression in oral squamous cell carcinoma
Source: eLife journal article supplement (doi:10.7554/elife.99122), 2024-09-06
Supplement: fig4-figsupp3-data1 [file elife-99122-fig4-figsupp3-data1-v1.zip]

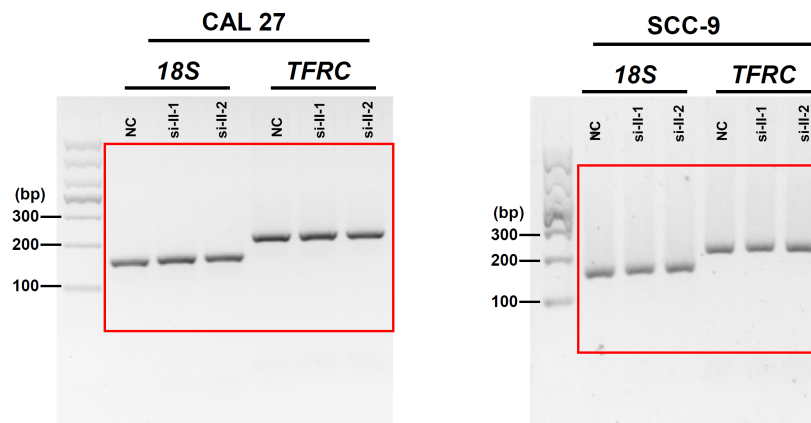

**Figure 4-figure supplement 3, Source Data 1.** Original RT-PCR images corresponding to Figure 4-figure supplement 3A. The left image corresponds to CAL 27. The right image corresponds to SCC-9. 18S rRNA served as a loading control.
