# Supplementary material for: RUNX2 isoform II protects cancer cells from ferroptosis and apoptosis by promoting PRDX2 expression in oral squamous cell carcinoma
Source: eLife journal article supplement (doi:10.7554/elife.99122), 2024-09-06
Supplement: fig4-figsupp3-data1 [file fig4-figsupp3-data5.xlsx]

## Sheet: Sheet1
shNC	shisoform II
262.675	233.023
247.345	238.835
252.23	247.122
241.984	234.588
Unpaired t test, n=4. four biological replicates
