# Supplementary material for: RUNX2 isoform II protects cancer cells from ferroptosis and apoptosis by promoting PRDX2 expression in oral squamous cell carcinoma
Source: eLife journal article supplement (doi:10.7554/elife.99122), 2024-09-06
Supplement: fig4-figsupp4-data1 [file fig4-figsupp4-data1.xlsx]

## Sheet: Sheet1
Vector+siNC	Vector+si-II	PRDX2+siNC	PRDX2+si-II
6.26	27.37	6.83	10.74
5.29	26.96	5.84	7.47
7.41	23.44	5.38	8.62
7.83	26.63	2.06	7.51
one-way ANOVA test, n=4. four biological replicates
