# Supplementary material for: RUNX2 isoform II protects cancer cells from ferroptosis and apoptosis by promoting PRDX2 expression in oral squamous cell carcinoma
Source: eLife journal article supplement (doi:10.7554/elife.99122), 2024-09-06
Supplement: fig5-data1 [file fig5-data3.xlsx]

## Sheet: CAL 27
siNC	siHOX-1	siHOX-2
1	0.305177	0.185989
1	0.388388	0.104364
1	0.100271	0.743548
one-way ANOVA test, n=3. three biological replicates

## Sheet: SCC-9
siNC	siHOX-1	siHOX-2
1	0.19974	0.074017
1	0.258449	0.017207
1	0.676068	0.119625
one-way ANOVA test, n=3. three biological replicates
