# Supplementary material for: RUNX2 isoform II protects cancer cells from ferroptosis and apoptosis by promoting PRDX2 expression in oral squamous cell carcinoma
Source: eLife journal article supplement (doi:10.7554/elife.99122), 2024-09-06
Supplement: fig5-data1 [file fig5-data4.xlsx]

## Sheet: CAL 27
siNC	siHOX-1	siHOX-2
372	237	246
366	280	216
313	236	287
one-way ANOVA test, n=3. three biological replicates

## Sheet: SCC-9
siNC	siHOX-1	siHOX-2
200	68	47
141	75	64
140	84	77
one-way ANOVA test, n=3. three biological replicates
