# Supplementary material for: RUNX2 isoform II protects cancer cells from ferroptosis and apoptosis by promoting PRDX2 expression in oral squamous cell carcinoma
Source: eLife journal article supplement (doi:10.7554/elife.99122), 2024-09-06
Supplement: fig5-data1 [file fig5-data5.xlsx]

## Sheet: CAL 27
siNC	siHOX-1	siHOX-2
7.24	16.42	12.96
6.85	15.28	14.23
7.66	18.49	13.58
9.28	16.89	16.35
one-way ANOVA test, n=4. four biological replicates

## Sheet: SCC-9
siNC	siHOX-1	siHOX-2
3.67	20.26	10.06
4.32	16.38	8.81
4.11	15.23	9.19
one-way ANOVA test, n=3. three biological replicates
