# Supplementary material for: RUNX2 isoform II protects cancer cells from ferroptosis and apoptosis by promoting PRDX2 expression in oral squamous cell carcinoma
Source: eLife journal article supplement (doi:10.7554/elife.99122), 2024-09-06
Supplement: fig5-figsupp1-data1 [file elife-99122-fig5-figsupp1-data1-v1.zip]

**fig5-figsupp1-data1**. PDF file containing original RT-PCR images for Figure 5-figure supplement 1A, indicating the relevant bands and treatments.

**fig5-figsupp1-data2**. Original files for RT-PCR analysis displayed in Figure 5-figure supplement 1A.

**fig5-figsupp1-data3**. Original data corresponding to Figure 5-figure supplement 1A.

**fig5-figsupp1-data4**. Original data corresponding to Figure 5-figure supplement 1B.
