# Supplementary material for: RUNX2 isoform II protects cancer cells from ferroptosis and apoptosis by promoting PRDX2 expression in oral squamous cell carcinoma
Source: eLife journal article supplement (doi:10.7554/elife.99122), 2024-09-06
Supplement: fig5-figsupp1-data1 [file fig5-figsupp1-data3.xlsx]

## Sheet: CAL 27
Vector	siHOX-1	siHOX-2
1	1.14732	1.17579
1	0.889236	1.27173
1	0.769555	0.695114
one-way ANOVA test, n=3. three biological replicates

## Sheet: SCC-9
Vector	siHOX-1	siHOX-2
1	1.16135	1.37799
1	0.971649	1.10249
1	0.920791	0.981606
one-way ANOVA test, n=3. three biological replicates
