# Supplementary material for: RUNX2 isoform II protects cancer cells from ferroptosis and apoptosis by promoting PRDX2 expression in oral squamous cell carcinoma
Source: eLife journal article supplement (doi:10.7554/elife.99122), 2024-09-06
Supplement: fig5-figsupp1-data1 [file fig5-figsupp1-data4.xlsx]

## Sheet: Sheet1
Normal	Tumor
2.5102	319.211
20.3859	438.179
4.4092	457.189
26.5452	242.06
0.8673	53.1021
0	207.262
20.5529	65.4521
0	10.8923
0.7881	125.304
20.4631	742.444
0	55.2826
3.9401	45.9184
6.3694	209.607
6.4279	179.139
6.1728	53.8267
18.0288	310.274
1.8875	35.7658
2.4166	72.3128
1.9831	20.4504
0	146.769
1.6901	118.437
0.4907	221.246
42.023	149.45
30.6905	280.575
1.7313	122.274
1.4959	2.8297
24.1348	66.6451
0	22.0322
1.9724	32.066
0	170.932
9.245	29.7444
3.2092	359.889
	22.716
	66.1807
	92.6689
	87.2908
	142.212
	116.318
	89.4303
	145.423
	191.907
	33.6511
	221.619
	43.768
	56.7103
	8.658
	28.3607
	21.1924
	230.809
	89.8918
	122.645
	42.7423
	90.9006
	33.8391
	268.639
	67.0961
	61.2833
	151.648
	35.1822
	53.929
	24.5524
	39.0497
	63.8146
	157.534
	283.016
	29.2593
	26.6667
	705.556
	27.8696
	41.7066
	227.647
	43.2692
	214.036
	299.119
	67.8063
	320.678
	275.345
	510.483
	220.245
	92.1875
	460.961
	19.2713
	164.602
	149.095
	125.988
	83.1645
	75.0289
	48.3019
	167.975
	136.257
	93.2225
	122.638
	46.2557
	65.0752
	151.581
	166.351
	158.723
	181.961
	45.8518
	116.297
	16.4271
	78.6021
	13.5891
	45.7843
	78.7004
	6.8104
	47.1218
	108.871
	115.314
	135.149
	529.018
	29.6817
	31.7833
	184.35
	107.115
	226.064
	96.4083
	180.328
	221.094
	131.239
	495.491
	160.494
	82.4343
	541.466
	475.853
	67.7509
	133.575
	269.762
	125.361
	92.6214
	25.0158
	198.609
	481.379
	126.526
	91.5704
	47.3367
	70.9334
	41.7024
	57.4324
	12.2393
	63.9641
	175.172
	162.689
	123.745
	172.519
	11.0422
	34.3915
	172.875
	299.764
	76.4843
	15.7967
	128.412
	786.418
	154.11
	34.6244
	229.854
	41.0761
	216.633
	34.0194
	244.969
	387.616
	79.1161
	53.4492
	182.542
	272.391
	15.9405
	200.703
	292.745
	124.365
	217.742
	15.6695
	74.8149
	83.2333
	233.39
	85.0327
	102.845
	88.7189
	216.549
	360.845
	38.7477
	23.2558
	31.9827
	19.849
	95.7652
	39.6913
	416.226
	86.8056
	455.056
	128.691
	28.8104
	48.9943
	86.0098
	505.908
	53.3848
	35.1967
	58.6667
	88.2501
	65.1097
	449.828
	55.5372
	117.959
	72.8418
	116.499
	102.175
	17.0822
	229.705
	124.639
	247.877
	153.54
	17.834
	49.7766
	28.4136
	294.58
	123.049
	166.509
	241.225
	447.182
	160.563
	2.4557
	149.148
	15.0198
	53.5558
	331.038
	113.523
	330.941
	235.54
	132.466
	4.9751
	66.0966
	120.993
	46.1435
	108.922
	114.342
	66.3598
	62.585
	44.7076
	106.329
	38.6032
	246.692
	6.9294
	149.421
	2.3627
	0.5328
	53.3175
	35.1549
	117.015
	478.899
	218.543
	118.734
	307.341
	155.473
	51.5365
	76.1227
	262.058
	344.914
	385.204
	80.4067
	269.918
	218.452
	163.538
	131.442
	17.0052
	26.3181
	192.735
	3.7879
	39.9556
	470
	39.996
	316.538
	287.227
	77.8516
	149.184
	140.571
	58.545
	25.7033
	165.193
	52.3815
	0
	41.4483
	435.942
	323.895
	90.4382
	349.291
	269.37
	40.985
	157.969
	195.019
	384.014
	110.555
	415.402
	450.953
	260.8
	171.341
	54.8712
	98.4463
	295.974
	156.377
	247.893
	253.878
	355.128
	536
	22.2701
	211.524
	284.885
	289.985
	172.727
	444.406
	386.177
	88.9423
Mann-Whitney test, Normal tissues (32 cases), Tumor tissues (309 cases)
