# Supplementary material for: RUNX2 isoform II protects cancer cells from ferroptosis and apoptosis by promoting PRDX2 expression in oral squamous cell carcinoma
Source: eLife journal article supplement (doi:10.7554/elife.99122), 2024-09-06
Supplement: fig5-figsupp2-data1 [file fig5-figsupp2-data3.xlsx]

## Sheet: Sheet1
Normal	Tumor
0.225589	0.601292
0.096847	1.20101
0.575736	0.588401
0.206354	0.654618
0.130399	1.46267
0.246964	1.9985
0.102688	2.03015
0.420204	1.2257
0.107585	2.26459
0.530506	0.93217
0.220144	1.45347
Mann-Whitney test, Normal or Tumor tissues (11 cases)
