# Supplementary material for: RUNX2 isoform II protects cancer cells from ferroptosis and apoptosis by promoting PRDX2 expression in oral squamous cell carcinoma
Source: eLife journal article supplement (doi:10.7554/elife.99122), 2024-09-06
Supplement: fig6-data1 [file elife-99122-fig6-data1-v2.zip]

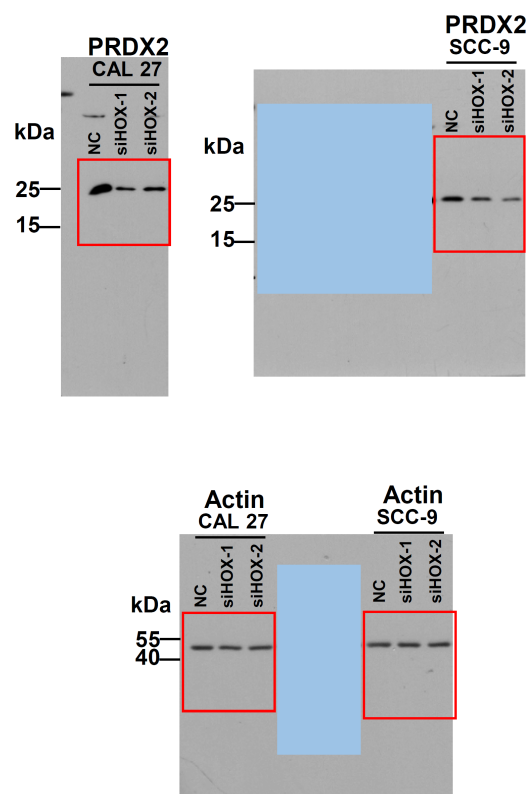

**Figure 6, Source Data 4.** Original Western blot images corresponding to Figure 6B. Actin served as a loading control.
