# Supplementary material for: RUNX2 isoform II protects cancer cells from ferroptosis and apoptosis by promoting PRDX2 expression in oral squamous cell carcinoma
Source: eLife journal article supplement (doi:10.7554/elife.99122), 2024-09-06
Supplement: fig6-data1 [file fig6-data3.xlsx]

## Sheet: CAL 27
siNC	siHOX-1	siHOX-2
1	0.742322	0.594805
1	0.768877	0.739649
1	0.871663	0.845894
1	0.593616	0.633548
one-way ANOVA test, n=4. four biological replicates

## Sheet: SCC-9
siNC	siHOX-1	siHOX-2
1	0.629374	0.522479
1	0.539504	0.698905
1	0.469638	0.40085
one-way ANOVA test, n=3. three biological replicates
