# Supplementary material for: RUNX2 isoform II protects cancer cells from ferroptosis and apoptosis by promoting PRDX2 expression in oral squamous cell carcinoma
Source: eLife journal article supplement (doi:10.7554/elife.99122), 2024-09-06
Supplement: fig6-data1 [file fig6-data6.xlsx]

## Sheet: CAL 27
siNC	siHOX-1	siHOX-2
1	0.387177	0.511164
1	0.309497	0.442706
1	0.08321	0.312225
one-way ANOVA test, n=3. three biological replicates

## Sheet: SCC-9
siNC	siHOX-1	siHOX-2
1	0.604663	0.397607
1	0.064285	0.579441
1	0.333282	0.549848
one-way ANOVA test, n=3. three biological replicates
