# Supplementary material for: RUNX2 isoform II protects cancer cells from ferroptosis and apoptosis by promoting PRDX2 expression in oral squamous cell carcinoma
Source: eLife journal article supplement (doi:10.7554/elife.99122), 2024-09-06
Supplement: fig6-data1 [file fig6-data7.xlsx]

## Sheet: CAL 27
siNC(X104)	siHOX-1(X104)	siHOX-2(X104)
1.5897	2.6392	2.3592
1.6917	2.972	2.4945
1.562	2.1464	2.7215
1.4319	2.2742	3.0138
one-way ANOVA test, n=4. four biological replicates

## Sheet: SCC-9
siNC(X104)	siHOX-1(X104)	siHOX-2(X104)
9.3518	16.9116	16.0139
9.0281	18.3934	18.1394
9.1831	17.2854	20.1943
one-way ANOVA test, n=3. three biological replicates
