# Supplementary material for: RUNX2 isoform II protects cancer cells from ferroptosis and apoptosis by promoting PRDX2 expression in oral squamous cell carcinoma
Source: eLife journal article supplement (doi:10.7554/elife.99122), 2024-09-06
Supplement: fig6-data1 [file fig6-data8.xlsx]

## Sheet: CAL 27
siNC(X103)	siHOX-1(X103)	siHOX-2(X103)
2.925	4.309	4.072
2.366	4.129	4.247
2.821	4.058	5.389
2.636	3.539	4.239
one-way ANOVA test, n=4. four biological replicates

## Sheet: SCC-9
siNC(X103)	siHOX-1(X103)	siHOX-2(X103)
4.821	12.456	13.57
4.994	11.984	13.95
4.414	12.258	15.105
4.967	10.51	13.885
one-way ANOVA test, n=4. four biological replicates
