# Supplementary material for: RUNX2 isoform II protects cancer cells from ferroptosis and apoptosis by promoting PRDX2 expression in oral squamous cell carcinoma
Source: eLife journal article supplement (doi:10.7554/elife.99122), 2024-09-06
Supplement: fig6-data1 [file fig6-data9.xlsx]

## Sheet: Sheet1
DMSO(X104)			Fer-1(X104)
NC	siHOX-1	siHOX-2	NC	siHOX-1	siHOX-2
25.6561	35.9192	38.7861	21.3071	31.3135	28.2541
22.8221	37.4416	37.6795	23.421	32.4188	30.1964
24.7392	36.5772	37.4585	21.9988	32.4167	27.338
one-way ANOVA test, n=3. three biological replicates
