# Supplementary material for: RUNX2 isoform II protects cancer cells from ferroptosis and apoptosis by promoting PRDX2 expression in oral squamous cell carcinoma
Source: eLife journal article supplement (doi:10.7554/elife.99122), 2024-09-06
Supplement: fig6-data1 [file fig6-data10.xlsx]

## Sheet: Sheet1
DMSO(X103)			Fer-1(X103)
NC	siHOX-1	siHOX-2	NC	siHOX-1	siHOX-2
2.789	5.64	6.571	2.982	5.087	4.853
3.177	6.352	6.296	3.194	4.582	5.231
2.96	6.645	7.068	2.78	5.454	4.992
3.423	7.285	6.684	3.238	4.692	5.583
one-way ANOVA test, n=4. four biological replicates
