# Supplementary material for: RUNX2 isoform II protects cancer cells from ferroptosis and apoptosis by promoting PRDX2 expression in oral squamous cell carcinoma
Source: eLife journal article supplement (doi:10.7554/elife.99122), 2024-09-06
Supplement: fig6-data1 [file fig6-source data legends.docx]

**fig6-data1**. PDF file containing original RT-PCR images for Figure 6A, indicating the relevant bands and treatments.

**fig6-data2**. Original files for RT-PCR analysis displayed in Figure 6A.

**fig6-data3**. Original data corresponding to Figure 6A.

**fig6-data4**. PDF file containing original western blot images for Figure 6B, indicating the relevant bands and treatments.

**fig6-data5**. Original files for western blot analysis displayed in Figure 6B.

**fig6-data6**. Original data corresponding to Figure 6B.

**fig6-data7**. Original data corresponding to Figure 6C.

**fig6-data8**. Original data corresponding to Figure 6D.

**fig6-data9**. Original data corresponding to Figure 6G.

**fig6-data10**. Original data corresponding to Figure 6H.
