# Supplementary material for: RUNX2 isoform II protects cancer cells from ferroptosis and apoptosis by promoting PRDX2 expression in oral squamous cell carcinoma
Source: eLife journal article supplement (doi:10.7554/elife.99122), 2024-09-06
Supplement: fig6-figsupp1-data1 [file fig6-figsupp1-data3.xlsx]

## Sheet: CAL 27
siNC	siHOX-1	siHOX-2
1	0.712317	0.512646
1	0.579532	0.837723
1	0.759916	0.884937
1	0.673293	0.855011
one-way ANOVA test, n=4. four biological replicates

## Sheet: SCC-9
siNC	siHOX-1	siHOX-2
1	0.578775	0.332723
1	0.898206	0.707539
1	0.785606	0.470487
1	0.59079	0.315236
one-way ANOVA test, n=4. four biological replicates
