# Supplementary material for: RUNX2 isoform II protects cancer cells from ferroptosis and apoptosis by promoting PRDX2 expression in oral squamous cell carcinoma
Source: eLife journal article supplement (doi:10.7554/elife.99122), 2024-09-06
Supplement: fig6-figsupp1-data1 [file fig6-figsupp1-data6.xlsx]

## Sheet: CAL 27
siNC	siHOX-1	siHOX-2
1	0.545029	0.678404
1	0.469975	0.507648
1	0.242093	0.531163
one-way ANOVA test, n=3. three biological replicates

## Sheet: SCC-9
siNC	siHOX-1	siHOX-2
1	0.874003	0.347975
1	0.300988	0.736753
1	0.573584	0.628322
1	0.820092	0.800699
one-way ANOVA test, n=4. four biological replicates
