# Supplementary material for: RUNX2 isoform II protects cancer cells from ferroptosis and apoptosis by promoting PRDX2 expression in oral squamous cell carcinoma
Source: eLife journal article supplement (doi:10.7554/elife.99122), 2024-09-06
Supplement: fig6-figsupp3-data1 [file elife-99122-fig6-figsupp3-data1-v1.zip]

**fig6-figsupp3-data1**. Original data corresponding to Figure 6-figure supplement 3.
