# Supplementary material for: RUNX2 isoform II protects cancer cells from ferroptosis and apoptosis by promoting PRDX2 expression in oral squamous cell carcinoma
Source: eLife journal article supplement (doi:10.7554/elife.99122), 2024-09-06
Supplement: fig6-figsupp3-data1 [file fig6-figsupp3-data1.xlsx]

## Sheet: Sheet1
DMSO			Z-VAD
siNC	siHOX-1	siHOX-2	siNC	siHOX-1	siHOX-2
1.9	13.14	13.63	0.78	5.82	3.94
1.26	17.84	13.3	0.72	4.51	1.66
1.49	17.85	16.23	0.73	6	2.49
one-way ANOVA test, n=3. three biological replicates
