# Supplementary material for: RUNX2 isoform II protects cancer cells from ferroptosis and apoptosis by promoting PRDX2 expression in oral squamous cell carcinoma
Source: eLife journal article supplement (doi:10.7554/elife.99122), 2024-09-06
Supplement: fig6-figsupp4-data1 [file fig6-figsupp4-data1.xlsx]

## Sheet: Sheet1
Fer-1	Z-VAD	Fer-1+Z-VAD
22.054	63.2836	75.4579
23.2955	54.9242	70.8459
25.5245	57.996	73.7339
one-way ANOVA test, n=3. three biological replicates
