# Supplementary material for: RUNX2 isoform II protects cancer cells from ferroptosis and apoptosis by promoting PRDX2 expression in oral squamous cell carcinoma
Source: eLife journal article supplement (doi:10.7554/elife.99122), 2024-09-06
Supplement: fig7-data1 [file fig7-data1.xlsx]

## Sheet: Sheet1
Vector+siNC	Vector+siHOX	Isoform II+siNC	Isoform II+siHOX
5.67	30.96	5.3	26.43
3.18	22.73	4.15	19.16
3.43	27.19	4.73	18.5
3.28	30.75	5.66	16.43
one-way ANOVA test, n=4. four biological replicates
