# Supplementary material for: RUNX2 isoform II protects cancer cells from ferroptosis and apoptosis by promoting PRDX2 expression in oral squamous cell carcinoma
Source: eLife journal article supplement (doi:10.7554/elife.99122), 2024-09-06
Supplement: fig7-data1 [file fig7-data2.xlsx]

## Sheet: Sheet1
Vector+siNC(X104)	Vector+siHOX(X104)	Isoform II+siNC(X104)	Isoform II+siHOX(X104)
2.1813	3.2924	1.2214	1.5597
2.1798	3.8909	1.454	1.9116
2.2657	3.6211	1.45033	1.6854
2.2665	3.3583	1.5613	1.591
one-way ANOVA test, n=4. four biological replicates
