# Supplementary material for: RUNX2 isoform II protects cancer cells from ferroptosis and apoptosis by promoting PRDX2 expression in oral squamous cell carcinoma
Source: eLife journal article supplement (doi:10.7554/elife.99122), 2024-09-06
Supplement: fig7-data1 [file fig7-data3.xlsx]

## Sheet: Sheet1
Vector+siNC(X103)	Vector+siHOX(X103)	Isoform II+siNC(X103)	Isoform II+siHOX(X103)
2.173	2.42	1.889	2.358
2.13	2.541	1.912	2.151
2.254	2.462	1.913	2.331
one-way ANOVA test, n=3. three biological replicates
