# Supplementary material for: RUNX2 isoform II protects cancer cells from ferroptosis and apoptosis by promoting PRDX2 expression in oral squamous cell carcinoma
Source: eLife journal article supplement (doi:10.7554/elife.99122), 2024-09-06
Supplement: fig7-data1 [file fig7-data6.xlsx]

## Sheet: Sheet1
Vector+siNC	Vector+siHOX	Isoform II+siNC	Isoform II+siHOX
1	0.874324	1.21011	1.13471
1	0.877621	1.20871	1.06342
1	0.890748	1.16992	1.08105
one-way ANOVA test, n=3. three biological replicates
