# Supplementary material for: RUNX2 isoform II protects cancer cells from ferroptosis and apoptosis by promoting PRDX2 expression in oral squamous cell carcinoma
Source: eLife journal article supplement (doi:10.7554/elife.99122), 2024-09-06
Supplement: fig7-data1 [file fig7-data9.xlsx]

## Sheet: Sheet1
Vector+siNC	Vector+siHOX	Isoform II+siNC	Isoform II+siHOX
1	0.587895	1.3835	0.736985
1	0.807966	1.28378	1.22648
1	0.416096	1.27675	0.905841
1	0.657419	1.35223	0.837001
one-way ANOVA test, n=4. four biological replicates
