# Supplementary material for: RUNX2 isoform II protects cancer cells from ferroptosis and apoptosis by promoting PRDX2 expression in oral squamous cell carcinoma
Source: eLife journal article supplement (doi:10.7554/elife.99122), 2024-09-06
Supplement: fig7-data1 [file fig7-data10.xlsx]

## Sheet: Sheet1
Vector+siNC(X104)	Vector+siHOX(X104)	PRDX2+siNC(X104)	PRDX2+siHOX(X104)
18.3588	29.5659	12.9361	26.9081
17.4786	33.0743	15.4281	27.9287
19.1577	30.6227	16.6119	25.9285
one-way ANOVA test, n=3. three biological replicates
