# Supplementary material for: RUNX2 isoform II protects cancer cells from ferroptosis and apoptosis by promoting PRDX2 expression in oral squamous cell carcinoma
Source: eLife journal article supplement (doi:10.7554/elife.99122), 2024-09-06
Supplement: fig7-data1 [file fig7-data11.xlsx]

## Sheet: Sheet1
Vector+siNC(X103)	Vector+siHOX(X103)	PRDX2+siNC(X103)	PRDX2+siHOX(X103)
3.583	5.33	2.794	4.756
3.348	6.097	3	4.692
3.571	6.312	3.234	5.096
4.125	6.793	3.373	4.776
one-way ANOVA test, n=4. four biological replicates
