# Supplementary material for: RUNX2 isoform II protects cancer cells from ferroptosis and apoptosis by promoting PRDX2 expression in oral squamous cell carcinoma
Source: eLife journal article supplement (doi:10.7554/elife.99122), 2024-09-06
Supplement: fig7-figsupp1-data1 [file elife-99122-fig7-figsupp1-data1-v1.zip]

**fig7-figsupp1-data1**. PDF file containing original RT-PCR image for Figure 7-figure supplement 1A, indicating the relevant bands and treatments.

**fig7-figsupp1-data2**. Original file for RT-PCR analysis displayed in Figure 7-figure supplement 1A.

**fig7-figsupp1-data3**. PDF file containing original western blot images for Figure 7-figure supplement 1B, indicating the relevant bands and treatments.

**fig7-figsupp1-data4**. Original files for western blot analysis displayed in Figure 7-figure supplement 1B.

**fig7-figsupp1-data5**. PDF file containing original RT-PCR image for Figure 7-figure supplement 1C, indicating the relevant bands and treatments.

**fig7-figsupp1-data6**. Original file for RT-PCR analysis displayed in Figure 7-figure supplement 1C.

**fig7-figsupp1-data7**. PDF file containing original western blot images for Figure 7-figure supplement 1D, indicating the relevant bands and treatments.

**fig7-figsupp1-data8**. Original files for western blot analysis displayed in Figure 7-figure supplement 1D.
