# Supplementary material for: RUNX2 isoform II protects cancer cells from ferroptosis and apoptosis by promoting PRDX2 expression in oral squamous cell carcinoma
Source: eLife journal article supplement (doi:10.7554/elife.99122), 2024-09-06
Supplement: fig7-figsupp2-data1 [file fig7-figsupp2-data1.xlsx]

## Sheet: Sheet1
Vector+siNC	Vector+siHOX	PRDX2+siNC	PRDX2+siHOX
6.96	18.46	6.17	11.71
6.82	19.1	6.28	10.6
7.92	17.58	6.1	11.67
6.31	18.82	6.37	10.58
one-way ANOVA test, n=4. four biological replicates
