# Supplementary figures and images for: RUNX2 isoform II protects cancer cells from ferroptosis and apoptosis by promoting PRDX2 expression in oral squamous cell carcinoma
Source: eLife journal article supplement (doi:10.7554/elife.99122), 2024-09-06

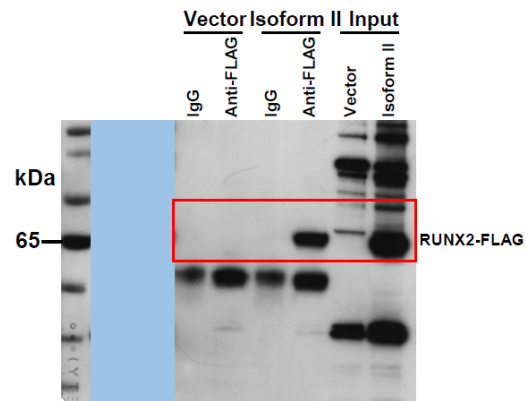

**Figure 4, Source Data 17.** Original Western blot image corresponding to Figure 4I.

Supplement: fig4-data1 [file elife-99122-fig4-data1-v1.zip]
